# Supplementary material for: Human pressure homogenises species and traits globally
Source: Research Square preprint supplement (doi:10.21203/rs.3.rs-5395446/v1), 2024-11-27
Supplement: Supplementary file 1 [file 622ae960280a2e1e2a29dc05.xlsx]

## Sheet: Datasets_description
ID	source	ecosystem_type	taxa_fine	taxa_coarse	spatial_extent_sq_km	spatial_min_km	latitude_absolute_mean	species_pool_size	sampling_start	sampling_end	sampling_original_time	measurement	main_land_use	basis_for_classification	classification_source	reference	organism_size	resource_use	habitat_use	dispersal_ability
barbaro_birds_1	Distance decay 2.0	terrestrial	bird	vertebrate	32.1	0.07	44.68	53	2002	2003		abundance	forest	The study was located in plantation forests that cover around 1 million ha in the Landes de Gascogne region, south-western France. The landscape is dominated by even-aged stands of native maritime pine with a rotation cycle of 40–50 yr. Such a forest management creates mosaic landscapes composed of even-aged pine stands interspersed with recent clearcuts covered by grassland or heathland vegetati…	Google earth images and ref.	Barbaro, L., & Van Halder, I. (2009). Linking bird, carabid beetle and butterfly life_history traits to habitat fragmentation in mosaic landscapes. Ecography, 32(2), 321-333.	body mass	diet	foraging	range
barbaro_birds_2	Distance Decay 2.0	terrestrial	bird	vertebrate	235.88	0	-43.74	21	2010	2011		abundance	forest	The study area was the volcanic Banks Peninsula located on the east coast of the South Island, New Zealand, covering an area of ca. 1,000 km_ and peaking at 920 m asl. Banks Peninsula was almost entirely forested until the arrival of European settlers in ca. 1840 which was followed by rapid and large-scale deforestation leading to 90 % deforestation by the early twentieth century. Recently there …	Google earth images and ref.	Barbaro, L., Brockerhoff, E. G., Giffard, B., & Van Halder, I. (2012). Edge and area effects on avian assemblages and insectivory in fragmented native forests. Landscape ecology, 27(10), 1451-1463	body mass	diet	foraging	move
barber_beetles	Google Scholar search	terrestrial	insect	invertebrate	11.45	0.31	41.89	56	2013	2013		abundance	agriculture	The study was conducted at Nachusa Grasslands, a large-scale restoration project owned and managed by The Nature Conservancy (TNC). Most of the preserve contains restored tallgrass prairies with interspersed remnants that were never ploughed. Restoration of agricultural fields (generally corn/soy rotation) to diverse native grassland vegetation began in 1987. Restoration and management techniques…	Google earth images and ref.	Barber, N. A., Lamagdeleine-Dent, K. A., Willand, J. E., Jones, H. P., & McCravy, K. W. (2017). Species and functional trait re-assembly of ground beetle communities in restored grasslands. Biodiversity and Conservation, 26, 3481-3498.	body length	diet	habitat type (grasslands, cultivated fields, open forests and other open habitats)	wing morphology
bdm_birds	Co-authors	terrestrial	bird	vertebrate	40471.6	9.99	46.8	116	2018	2018		abundance	multiple	Data comes from the Biodiversity Monitoring program of switzerland and covers the whole country, from the urban areas across grassland and forests	Google earth images		body mass	diet	foraging	migration
bdm_butterflies	Co-authors	terrestrial	insect	invertebrate	50347	5.98	46.83	175	2016	2020		abundance	multiple	Data comes from the Biodiversity Monitoring program of switzerland and covers the whole country, from the urban areas across grassland and forests	Google earth images		Body length	Phagy	Habitat type (mesophilic meadows and pastures; semi-arid grasslands; dry and steppe grasslands; rocky corridors [rock, subalpine, alpine]; bushes and fringing vegetation; woodlands; tall herbaceous corridors; wet areas [flat moors, wet meadows, bogs, high moors]; ruderal areas [vacant lots, fields, roadsides]; agricultural land [arable crops, abandoned cultures]; pastures and meadows [mesophilic,…	Home range (sedentary [very true to location, location-based]; wandering [vagabond]; migratory)
bettergardens_bowltrap_apidae	Co-authors	terrestrial	insect	invertebrate	68.02	0.11	47.38	112	2015	2015		abundance	urban	The study took place in urban gardens in the city of Zurich, Switzerland. Zurich lies in the temperate climate zone with mean annual temperature of 9.3_°C (1981–2010) and mean annual precipitation of 1134_mm. With an area of approximately 92_km2 and a population of 0.4 million citizen it belongs to the globally most common city class and is therefore an ideal system to study BEF relationships in …	Google earth images and ref.	Tresch, S., Frey, D., Le Bayon, R. C., Zanetta, A., Rasche, F., Fliessbach, A., & Moretti, M. (2019). Litter decomposition driven by soil fauna, plant diversity and soil management in urban gardens. Science of the Total Environment, 658, 1614-1629.	Mean Intertegular distance	Feeding specialization	Habitat generalism	Home range (feeding distance in km)
bettergardens_bowltrap_heteroptera	Co-authors	terrestrial	insect	invertebrate	67.9957	0.106901	47.3817	175	2015	2015		abundance	urban	The study took place in urban gardens in the city of Zurich, Switzerland. Zurich lies in the temperate climate zone with mean annual temperature of 9.3_°C (1981–2010) and mean annual precipitation of 1134_mm. With an area of approximately 92_km2 and a population of 0.4 million citizen it belongs to the globally most common city class and is therefore an ideal system to study BEF relationships in …	Google earth images and ref.	Tresch, S., Frey, D., Le Bayon, R. C., Zanetta, A., Rasche, F., Fliessbach, A., & Moretti, M. (2019). Litter decomposition driven by soil fauna, plant diversity and soil management in urban gardens. Science of the Total Environment, 658, 1614-1629.	Body length	Feeding guild	Habitat generalism	Wing form
bettergardens_bowltrap_homoptera	Co-authors	terrestrial	insect	invertebrate	67.9929	0.106908	47.3817	94	2015	2015		abundance	urban	The study took place in urban gardens in the city of Zurich, Switzerland. Zurich lies in the temperate climate zone with mean annual temperature of 9.3_°C (1981–2010) and mean annual precipitation of 1134_mm. With an area of approximately 92_km2 and a population of 0.4 million citizen it belongs to the globally most common city class and is therefore an ideal system to study BEF relationships in …	Google earth images and ref.	Tresch, S., Frey, D., Le Bayon, R. C., Zanetta, A., Rasche, F., Fliessbach, A., & Moretti, M. (2019). Litter decomposition driven by soil fauna, plant diversity and soil management in urban gardens. Science of the Total Environment, 658, 1614-1629.	Body length	Feeding guild	Stratum	Wing form
bettergardens_bowltrap_syrphidae	Co-authors	terrestrial	insect	invertebrate	64.5218	0.115942	47.3806	52	2015	2015		abundance	urban	The study took place in urban gardens in the city of Zurich, Switzerland. Zurich lies in the temperate climate zone with mean annual temperature of 9.3_°C (1981–2010) and mean annual precipitation of 1134_mm. With an area of approximately 92_km2 and a population of 0.4 million citizen it belongs to the globally most common city class and is therefore an ideal system to study BEF relationships in …	Google earth images and ref.	Tresch, S., Frey, D., Le Bayon, R. C., Zanetta, A., Rasche, F., Fliessbach, A., & Moretti, M. (2019). Litter decomposition driven by soil fauna, plant diversity and soil management in urban gardens. Science of the Total Environment, 658, 1614-1629.	Intertegular Distance	Food specialization (adult)	Saproxylic larvae	Wing loading
bettergardens_gastropoda	Co-authors	terrestrial	gastropod	invertebrate	68.0193	0.106901	47.3817	49	2015	2015		abundance	urban	The study took place in urban gardens in the city of Zurich, Switzerland. Zurich lies in the temperate climate zone with mean annual temperature of 9.3_°C (1981–2010) and mean annual precipitation of 1134_mm. With an area of approximately 92_km2 and a population of 0.4 million citizen it belongs to the globally most common city class and is therefore an ideal system to study BEF relationships in …	Google earth images and ref.	Tresch, S., Frey, D., Le Bayon, R. C., Zanetta, A., Rasche, F., Fliessbach, A., & Moretti, M. (2019). Litter decomposition driven by soil fauna, plant diversity and soil management in urban gardens. Science of the Total Environment, 658, 1614-1629.	Shell size	Feeding guild	Humidity	Snail mobility index
bettergardens_pitfall_araneae	Co-authors	terrestrial	insect	invertebrate	68.0364	0.106908	47.3817	162	2015	2015		abundance	urban	The study took place in urban gardens in the city of Zurich, Switzerland. Zurich lies in the temperate climate zone with mean annual temperature of 9.3_°C (1981–2010) and mean annual precipitation of 1134_mm. With an area of approximately 92_km2 and a population of 0.4 million citizen it belongs to the globally most common city class and is therefore an ideal system to study BEF relationships in …	Google earth images and ref.	Tresch, S., Frey, D., Le Bayon, R. C., Zanetta, A., Rasche, F., Fliessbach, A., & Moretti, M. (2019). Litter decomposition driven by soil fauna, plant diversity and soil management in urban gardens. Science of the Total Environment, 658, 1614-1629.	Body length	Food preference	Habitat width	Mobility mode
bettergardens_pitfall_carabidae	Co-authors	terrestrial	insect	invertebrate	68.0537	0.116521	47.3825	57	2015	2015		abundance	urban	The study took place in urban gardens in the city of Zurich, Switzerland. Zurich lies in the temperate climate zone with mean annual temperature of 9.3_°C (1981–2010) and mean annual precipitation of 1134_mm. With an area of approximately 92_km2 and a population of 0.4 million citizen it belongs to the globally most common city class and is therefore an ideal system to study BEF relationships in …	Google earth images and ref.	Tresch, S., Frey, D., Le Bayon, R. C., Zanetta, A., Rasche, F., Fliessbach, A., & Moretti, M. (2019). Litter decomposition driven by soil fauna, plant diversity and soil management in urban gardens. Science of the Total Environment, 658, 1614-1629.	Body length	Feeding guild	Habitat generalism	Wing form
bettergardens_pitfall_heteroptera	Co-authors	terrestrial	insect	invertebrate	68.0988	0.106901	47.3819	101	2015	2015		abundance	urban	The study took place in urban gardens in the city of Zurich, Switzerland. Zurich lies in the temperate climate zone with mean annual temperature of 9.3_°C (1981–2010) and mean annual precipitation of 1134_mm. With an area of approximately 92_km2 and a population of 0.4 million citizen it belongs to the globally most common city class and is therefore an ideal system to study BEF relationships in …	Google earth images and ref.	Tresch, S., Frey, D., Le Bayon, R. C., Zanetta, A., Rasche, F., Fliessbach, A., & Moretti, M. (2019). Litter decomposition driven by soil fauna, plant diversity and soil management in urban gardens. Science of the Total Environment, 658, 1614-1629.	Body length	Feeding guild	Habitat generalism	Wing form
bettergardens_pitfall_homoptera	Co-authors	terrestrial	insect	invertebrate	68.0424	0.106901	47.3817	77	2015	2015		abundance	urban	The study took place in urban gardens in the city of Zurich, Switzerland. Zurich lies in the temperate climate zone with mean annual temperature of 9.3_°C (1981–2010) and mean annual precipitation of 1134_mm. With an area of approximately 92_km2 and a population of 0.4 million citizen it belongs to the globally most common city class and is therefore an ideal system to study BEF relationships in …	Google earth images and ref.	Tresch, S., Frey, D., Le Bayon, R. C., Zanetta, A., Rasche, F., Fliessbach, A., & Moretti, M. (2019). Litter decomposition driven by soil fauna, plant diversity and soil management in urban gardens. Science of the Total Environment, 658, 1614-1629.	Size (mean)	Diet width	Stratum	Wing form
bexis_forest_birds	Co-authors	terrestrial	bird	vertebrate	49047.9	0.149182	50.8593	69	2018	2018		abundance	forest	The data comes from the Biodiversity Explotatories project which was sampled across three different regions of germany. A set of plots sampled in the same region is called an "exploratory". Within each exploratory, there are three hierarchical levels of study plots, on which research of different intensity and detail is conducted: (1) about 1000 grid plots (GPs), 500 in grasslands and 500 in fore…	Google earth images and ref.	Fischer, M., Bossdorf, O., Gockel, S., Hänsel, F., Hemp, A., Hessenmöller, D., ... & Weisser, W. W. (2010). Implementing large-scale and long-term functional biodiversity research: The Biodiversity Exploratories. Basic and applied Ecology, 11(6), 473-485.	Body mass (size)	Diet	Foraging stratum (water below surface, water around surface, ground, understory, mid-high, canopy, aerial)	Wing aspect ratio
bexis_forest_flightinterceptioncanopy_beetles	Distance Decay 2.0	terrestrial	insect	invertebrate	49054.1	0.149182	50.8616	832	2008	2008		abundance	forest	The data comes from the Biodiversity Explotatories project which was sampled across three different regions of germany. A set of plots sampled in the same region is called an "exploratory". Within each exploratory, there are three hierarchical levels of study plots, on which research of different intensity and detail is conducted: (1) about 1000 grid plots (GPs), 500 in grasslands and 500 in fore…	Google earth images and ref.	Fischer, M., Bossdorf, O., Gockel, S., Hänsel, F., Hemp, A., Hessenmöller, D., ... & Weisser, W. W. (2010). Implementing large-scale and long-term functional biodiversity research: The Biodiversity Exploratories. Basic and applied Ecology, 11(6), 473-485.	Mean body size	Feeding guild (short)	Stratum use (short)	Dispersal ability
bexis_forest_flightinterceptionunderstory_beetles	Distance Decay 2.0	terrestrial	insect	invertebrate	49051.6	0.149182	50.8616	1133	2008	2008		abundance	forest	The data comes from the Biodiversity Explotatories project which was sampled across three different regions of germany. A set of plots sampled in the same region is called an "exploratory". Within each exploratory, there are three hierarchical levels of study plots, on which research of different intensity and detail is conducted: (1) about 1000 grid plots (GPs), 500 in grasslands and 500 in fore…	Google earth images and ref.	Fischer, M., Bossdorf, O., Gockel, S., Hänsel, F., Hemp, A., Hessenmöller, D., ... & Weisser, W. W. (2010). Implementing large-scale and long-term functional biodiversity research: The Biodiversity Exploratories. Basic and applied Ecology, 11(6), 473-485.	Mean body size	Feeding guild (short)	Stratum use (short)	Dispersal ability
bexis_forest_hemiptera	Distance Decay 2.0	terrestrial	insect	invertebrate	49052.5	0.149181	50.8601	309	2008	2008		abundance	forest	The data comes from the Biodiversity Explotatories project which was sampled across three different regions of germany. A set of plots sampled in the same region is called an "exploratory". Within each exploratory, there are three hierarchical levels of study plots, on which research of different intensity and detail is conducted: (1) about 1000 grid plots (GPs), 500 in grasslands and 500 in fore…	Google earth images and ref.	Fischer, M., Bossdorf, O., Gockel, S., Hänsel, F., Hemp, A., Hessenmöller, D., ... & Weisser, W. W. (2010). Implementing large-scale and long-term functional biodiversity research: The Biodiversity Exploratories. Basic and applied Ecology, 11(6), 473-485.	Mean body size	Feeding guild (short)	Stratum use (short)	Dispersal ability
bexis_forest_pitfall_beetles	Distance Decay 2.0	terrestrial	insect	invertebrate	49053.4	0.149181	50.8601	1044	2008	2008		abundance	forest	The data comes from the Biodiversity Explotatories project which was sampled across three different regions of germany. A set of plots sampled in the same region is called an "exploratory". Within each exploratory, there are three hierarchical levels of study plots, on which research of different intensity and detail is conducted: (1) about 1000 grid plots (GPs), 500 in grasslands and 500 in fore…	Google earth images and ref.	Fischer, M., Bossdorf, O., Gockel, S., Hänsel, F., Hemp, A., Hessenmöller, D., ... & Weisser, W. W. (2010). Implementing large-scale and long-term functional biodiversity research: The Biodiversity Exploratories. Basic and applied Ecology, 11(6), 473-485.	Mean body size	Feeding guild (short)	Stratum use (short)	Dispersal ability
bexis_forest_plants	Public	terrestrial	plant	plant	49055.1	0.149181	50.8033	276	2015	2015		abundance	forest	The data comes from the Biodiversity Explotatories project which was sampled across three different regions of germany. A set of plots sampled in the same region is called an "exploratory". Within each exploratory, there are three hierarchical levels of study plots, on which research of different intensity and detail is conducted: (1) about 1000 grid plots (GPs), 500 in grasslands and 500 in fore…	Google earth images and ref.	Fischer, M., Bossdorf, O., Gockel, S., Hänsel, F., Hemp, A., Hessenmöller, D., ... & Weisser, W. W. (2010). Implementing large-scale and long-term functional biodiversity research: The Biodiversity Exploratories. Basic and applied Ecology, 11(6), 473-485.	Height	SLA (specific leaf area)	Ellenberg values: Temperature (T), Light (L), Moisture (F), pH (R), Nutrients (N)	Seed mass
bexis_forest_spiders	Distance Decay 2.0	terrestrial	insect	invertebrate	49058	0.149181	50.8601	244	2008	2008		abundance	forest	The data comes from the Biodiversity Explotatories project which was sampled across three different regions of germany. A set of plots sampled in the same region is called an "exploratory". Within each exploratory, there are three hierarchical levels of study plots, on which research of different intensity and detail is conducted: (1) about 1000 grid plots (GPs), 500 in grasslands and 500 in fore…	Google earth images and ref.	Fischer, M., Bossdorf, O., Gockel, S., Hänsel, F., Hemp, A., Hessenmöller, D., ... & Weisser, W. W. (2010). Implementing large-scale and long-term functional biodiversity research: The Biodiversity Exploratories. Basic and applied Ecology, 11(6), 473-485.	Mean body size	Diet	Stratum use (short)	Dispersal ability
bexis_forest_waterinsects	Co-authors	aquatic	waterinsect	invertebrate	46482.9	0.31464	50.7949	19	2014	2014		abundance	forest	The data comes from the Biodiversity Explotatories project which was sampled across three different regions of germany. A set of plots sampled in the same region is called an "exploratory". Within each exploratory, there are three hierarchical levels of study plots, on which research of different intensity and detail is conducted: (1) about 1000 grid plots (GPs), 500 in grasslands and 500 in fore…	Google earth images and ref.	Fischer, M., Bossdorf, O., Gockel, S., Hänsel, F., Hemp, A., Hessenmöller, D., ... & Weisser, W. W. (2010). Implementing large-scale and long-term functional biodiversity research: The Biodiversity Exploratories. Basic and applied Ecology, 11(6), 473-485.	Max larval length (mm)	Trophic level	Stratum within hole	Relative wing size
bexis_grassland_birds	Public	terrestrial	bird	vertebrate	47520.9	0.203146	50.8809	105	2018	2018		abundance	agriculture	The data comes from the Biodiversity Explotatories project which was sampled across three different regions of germany. A set of plots sampled in the same region is called an "exploratory". Within each exploratory, there are three hierarchical levels of study plots, on which research of different intensity and detail is conducted: (1) about 1000 grid plots (GPs), 500 in grasslands and 500 in fore…	Google earth images and ref.	Fischer, M., Bossdorf, O., Gockel, S., Hänsel, F., Hemp, A., Hessenmöller, D., ... & Weisser, W. W. (2010). Implementing large-scale and long-term functional biodiversity research: The Biodiversity Exploratories. Basic and applied Ecology, 11(6), 473-485.	Body mass	Diet	Foraging stratum (water below surface, water around surface, ground, understory, mid-high, canopy, aerial)	Wing aspect ratio
bexis_grassland_pitfall_beetles	Distance Decay 2.0	terrestrial	insect	invertebrate	761.433	0.225522	51.1657	105	2008	2008		abundance	agriculture	The data comes from the Biodiversity Explotatories project which was sampled across three different regions of germany. A set of plots sampled in the same region is called an "exploratory". Within each exploratory, there are three hierarchical levels of study plots, on which research of different intensity and detail is conducted: (1) about 1000 grid plots (GPs), 500 in grasslands and 500 in fore…	Google earth images and ref.	Fischer, M., Bossdorf, O., Gockel, S., Hänsel, F., Hemp, A., Hessenmöller, D., ... & Weisser, W. W. (2010). Implementing large-scale and long-term functional biodiversity research: The Biodiversity Exploratories. Basic and applied Ecology, 11(6), 473-485.	Mean body size	Feeding (short)	Stratum	Wing class
bexis_grassland_pitfall_spiders	Distance Decay 2.0	terrestrial	insect	invertebrate	761.248	0.225522	51.1657	131	2008	2008		abundance	agriculture	The data comes from the Biodiversity Explotatories project which was sampled across three different regions of germany. A set of plots sampled in the same region is called an "exploratory". Within each exploratory, there are three hierarchical levels of study plots, on which research of different intensity and detail is conducted: (1) about 1000 grid plots (GPs), 500 in grasslands and 500 in fore…	Google earth images and ref.	Fischer, M., Bossdorf, O., Gockel, S., Hänsel, F., Hemp, A., Hessenmöller, D., ... & Weisser, W. W. (2010). Implementing large-scale and long-term functional biodiversity research: The Biodiversity Exploratories. Basic and applied Ecology, 11(6), 473-485.	Size (mean)	Prey capture guild	Stratum	Mobility
bexis_grassland_plants	Public	terrestrial	plant	plant	47519.9	0.203146	50.8809	265	2015	2015		abundance	agriculture	The data comes from the Biodiversity Explotatories project which was sampled across three different regions of germany. A set of plots sampled in the same region is called an "exploratory". Within each exploratory, there are three hierarchical levels of study plots, on which research of different intensity and detail is conducted: (1) about 1000 grid plots (GPs), 500 in grasslands and 500 in fore…	Google earth images and ref.	Fischer, M., Bossdorf, O., Gockel, S., Hänsel, F., Hemp, A., Hessenmöller, D., ... & Weisser, W. W. (2010). Implementing large-scale and long-term functional biodiversity research: The Biodiversity Exploratories. Basic and applied Ecology, 11(6), 473-485.	Height	SLA (specific leaf area)	Ellenberg values: Temperature (T), Light (L), Moisture (F), pH (R), Nutrients (N)	Seed mass
bexis_grassland_sweepnet_beetles	Distance Decay 2.0	terrestrial	insect	invertebrate	47060.5	0.218748	50.94	300	2008	2008		abundance	agriculture	The data comes from the Biodiversity Explotatories project which was sampled across three different regions of germany. A set of plots sampled in the same region is called an "exploratory". Within each exploratory, there are three hierarchical levels of study plots, on which research of different intensity and detail is conducted: (1) about 1000 grid plots (GPs), 500 in grasslands and 500 in fore…	Google earth images and ref.	Fischer, M., Bossdorf, O., Gockel, S., Hänsel, F., Hemp, A., Hessenmöller, D., ... & Weisser, W. W. (2010). Implementing large-scale and long-term functional biodiversity research: The Biodiversity Exploratories. Basic and applied Ecology, 11(6), 473-485.	Mean body size	Feeding guild (short)	Stratum use (short)	Dispersal ability
bexis_grassland_sweepnet_heteroptera	Distance Decay 2.0	terrestrial	insect	invertebrate	47049.8	0.218748	51.0292	113	2008	2008		abundance	agriculture	The data comes from the Biodiversity Explotatories project which was sampled across three different regions of germany. A set of plots sampled in the same region is called an "exploratory". Within each exploratory, there are three hierarchical levels of study plots, on which research of different intensity and detail is conducted: (1) about 1000 grid plots (GPs), 500 in grasslands and 500 in fore…	Google earth images and ref.	Fischer, M., Bossdorf, O., Gockel, S., Hänsel, F., Hemp, A., Hessenmöller, D., ... & Weisser, W. W. (2010). Implementing large-scale and long-term functional biodiversity research: The Biodiversity Exploratories. Basic and applied Ecology, 11(6), 473-485.	Mean body size	Feeding guild (short)	Stratum use (short)	Dispersal ability
bexis_grassland_sweepnet_homoptera	Distance Decay 2.0	terrestrial	insect	invertebrate	47064.9	0.218748	50.9536	107	2008	2008		abundance	agriculture	The data comes from the Biodiversity Explotatories project which was sampled across three different regions of germany. A set of plots sampled in the same region is called an "exploratory". Within each exploratory, there are three hierarchical levels of study plots, on which research of different intensity and detail is conducted: (1) about 1000 grid plots (GPs), 500 in grasslands and 500 in fore…	Google earth images and ref.	Fischer, M., Bossdorf, O., Gockel, S., Hänsel, F., Hemp, A., Hessenmöller, D., ... & Weisser, W. W. (2010). Implementing large-scale and long-term functional biodiversity research: The Biodiversity Exploratories. Basic and applied Ecology, 11(6), 473-485.	Mean body size	Feeding guild (short)	Stratum use (short)	Dispersal ability
bexis_grassland_sweepnet_orthoptera	Distance Decay 2.0	terrestrial	insect	invertebrate	44319	0.225522	51.3816	17	2008	2008		abundance	agriculture	The data comes from the Biodiversity Explotatories project which was sampled across three different regions of germany. A set of plots sampled in the same region is called an "exploratory". Within each exploratory, there are three hierarchical levels of study plots, on which research of different intensity and detail is conducted: (1) about 1000 grid plots (GPs), 500 in grasslands and 500 in fore…	Google earth images and ref.	Fischer, M., Bossdorf, O., Gockel, S., Hänsel, F., Hemp, A., Hessenmöller, D., ... & Weisser, W. W. (2010). Implementing large-scale and long-term functional biodiversity research: The Biodiversity Exploratories. Basic and applied Ecology, 11(6), 473-485.	Mean body size	Feeding guild (short)		Dispersal ability
bexis_grassland_sweepnet_spiders	Distance Decay 2.0	terrestrial	insect	invertebrate	46984.1	0.218748	50.9088	75	2008	2008		abundance	agriculture	The data comes from the Biodiversity Explotatories project which was sampled across three different regions of germany. A set of plots sampled in the same region is called an "exploratory". Within each exploratory, there are three hierarchical levels of study plots, on which research of different intensity and detail is conducted: (1) about 1000 grid plots (GPs), 500 in grasslands and 500 in fore…	Google earth images and ref.	Fischer, M., Bossdorf, O., Gockel, S., Hänsel, F., Hemp, A., Hessenmöller, D., ... & Weisser, W. W. (2010). Implementing large-scale and long-term functional biodiversity research: The Biodiversity Exploratories. Basic and applied Ecology, 11(6), 473-485.	Size (mean)	Prey capture guild	Stratum use (short)	Dispersal ability
bonada_waterinsects	CESTES	aquatic	waterinsect	invertebrate	119.498	0.499	41.6933	70	2002	2002	1996	abundance	forest	The study was carried out in the Sant Llorenç del Munt Natural Park (Catalonia, NE Spain). This park, located north of the metropolitan area of Barcelona (NE Spain) and occupying 9,630 Ha, has benefited from conservation practices for 20 years. Vegetation is dominated by evergreen oak trees (Quercus ilex L.) and white pines (Pinus halepensis Miller), except in the steepest areas or in places with…	Google earth images and ref.	Bonada, N., Rieradevall, M., & Prat, N. (2007). Macroinvertebrate community structure and biological traits related to flow permanence in a Mediterranean river network. Hydrobiologia, 589, 91-106.	Maximal size (≤.25 cm, >.25-.5 cm, >.5-1 cm, >1-2 cm, >2-4 cm, >4-8 cm, >8 cm)	Food (Fine sediment + microorganisms, Detritus < 1 mm, Plant detritus ≥ 1 mm, Living microphytes, Living macrophytes, Dead animal > 1 mm, Living microinvertebrates, Living macroinvertebrates, Vertebrates)	Locomotion (Flier, Surface swimmer, Swimmer, Crawler, Burrower [epibenthic], Interstitial [endobenthic], Temporarily attached, Permanently attached)	Dissemination (Aquatic passive, Aquatic active, Aerial passive, Aerial active)
brindamour_fish	CESTES	aquatic	fish	vertebrate	0.369697	0.0157865	46.1454	7	2001	2001		abundance	forest	The fish communities of Lake Drouin were analyzed in this study. The lake is located on the Laurentian Shield in the province of Quebec, Canada. Lake Drouin (46°09_ N, 73°55_ W) has a surface area of 31 ha, a maximum depth of 22 m, and a perimeter of 4.8 km (calculation based on the sum of the linear lengths of our sampling units). The lake presents a littoral zone with woody debris, rocky substr…	Google earth images and ref.	Brind'Amour, A., Boisclair, D., Dray, S., & Legendre, P. (2011). Relationships between species feeding traits and environmental conditions in fish communities: a three_matrix approach. Ecological Applications, 21(2), 363-377.	Max length (fishbase)	Diet (Plant, Zoobenthos, Zooplankton, Fish)	Feeding habitat (water surface, benthic, water column, surface)	Migration (daily, seasonal)
brodersen_fish	Co-authors	aquatic	fish	vertebrate	30844.5	0	46.9572	33	2013	2015		abundance	multiple	Sites throughout Switzerland	Google earth images	Requires reference	Weight (continuous)	Diet (plant/algae, diatoms, plankton, insects, crustaceans, fish, other vertebrates) [binary categories]	Habitat type (freshwater, brackish, marine, demersal, benthopelagic, pelagic, anadromous, potamodromous, catadromous) [binary categories]	Aspect ratio of caudal fin (continuous)
carvalho_fish	CESTES	aquatic	fish	vertebrate	102359	1.06712	-15.2431	65	2008	2008		presence_absence	agriculture	Analyses were performed on data from 25 headwater streams distributed between Araguaia (13) and Tocantins (12) basins (Fig. 1). We considered a stream as a headwater by its location in the river system (1st - 3rd order; Vannote et al., 1980) and drainage area (10<drainage area<1,000km²; Meybeck et al., 1996). We determined stream order using Strahler's modification of Horton's scale (Petts, 1994)…	Google earth images and ref.	Carvalho, R. A., & Tejerina-Garro, F. L. (2015). The influence of environmental variables on the functional structure of headwater stream fish assemblages: a study of two tropical basins in Central Brazil. Neotropical Ichthyology, 13(2), 349–360. doi:10.1590/1982-0224-20130148	BM (continuous)	Trophic levels (troph1, troph2, troph3, troph5, troph6)	Water position (watpos1, watpos2, watpos3)	Migration (binary)
chapman_birds	Google Scholar search	terrestrial	bird	vertebrate	5562.54	0	4.92115	206	2008	2011		presence_absence	forest	We sampled bird communities in unlogged (old-growth) lowland dipterocarp rainforest and selectively logged production forests in the 1,000,000 ha Yayasan Sabah logging concession in Sabah, Malaysian Borneo, and in neighbouring oil palm plantations. Specifically, we focused on 45,200 ha of unlogged forest at the Danum Valley Conservation Area and Palum Tambun Watershed Reserve, and forests that ha…	Google eartch and ref.	Chapman, P. M., Tobias, J. A., Edwards, D. P., & Davies, R. G. (2018). Contrasting impacts of land‐use change on phylogenetic and functional diversity of tropical forest birds. Journal of Applied Ecology, 55(4), 1604-1614.	PCA axis of body size	PCA axis of trophic shape	Habitat (1 = type 1, 2 = type 2, 3 = type 3)	PCA axis of dispersal shape
decastro_waterinsects	Google Scholar search	aquatic	waterinsect	invertebrate	97915.7	1.20277	-19.1851	79	2010	2013		abundance	multiple	The study area was located in the Neotropical savanna of southeastern Brazil (the Cerrado), which has two well-defined seasons: a wet season from October to April (rainfall 100–330 mm/month), and a dry season from May to September (rainfall 10–55 mm/month), with a mean annual rainfall of 1,600 mm (Ferreira et al., 2017). We sampled wadeable first- to third-order streams (average width = 3.4 ± 1.9…	Google eartch and ref.	de Castro, D. M., Doledec, S., & Callisto, M. (2017). Landscape variables influence taxonomic and trait composition of insect assemblages in Neotropical savanna streams. Freshwater Biology, 62(8), 1472-1486.	Size (size_1, size_2, size_3, size_4, size_5, size_6) [fuzzy]	Diet (collector-gatherer, shredder, scraper, collector-filterer, predator) [fuzzy]	Habitat type (free-living, silk-net builder, case builder) [fuzzy]	Mobility (burrower, climber, sprawler, clinger, swimmer) [fuzzy]
desouzaqueiroz_amphibians	Google Scholar search	aquatic	amphibian	vertebrate	37492.5	0.0309209	-20.9245	24	2003	2003		presence_absence	agriculture	To test our hypotheses, we gathered information on the species composition of frog tadpoles in 38 ponds from four previous studies performed by our laboratory [9,14–16]. Because we obtained all data from literature surveys, no specific permission or licence to conduct the fieldwork was required. The four studies used the same tadpoles and pond characteristic sampling methodologies and carried out…	Google eartch and ref.	de Souza Queiroz, C., da Silva, F. R., & de Cerqueira Rossa-Feres, D. (2015). The relationship between pond habitat depth and functional tadpole diversity in an agricultural landscape. Royal Society open science, 2(7), 150165.	Maximum size (size_max)	Feeding behavior (Filter, Macrophagous, Scratcher)	Habitat type (Neustonic, Benthic, Nektonic) [fuzzy]	WTM.TL (continuous)
drose_ants		terrestrial	insect	invertebrate	2876.92	0.176996	-29.2207	62	2013	2014		abundance	agriculture	The study was carried out in the highland region in southern Brazil, Rio Grande do Sul state (Fig. 1A). Study sites were located in the municipalities of Cambará do Sul (29°02′ S, 50°34′ W), Jaquirana (28°53′ S, 50°21′ W), and São Francisco de Paula (29°26′ S, 50°34′ W), within a region of ca. 4800 km2. Altitude ranges from 900 to 1200 m a.s.l. Climate is humid subtropical, i.e., Cfb type accordi…	Google eartch and ref.	Dröse, W., Podgaiski, L. R., Gossner, M. M., Meyer, S. T., Hermann, J. M., Leidinger, J., ... & Overbeck, G. E. (2021). Passive restoration of subtropical grasslands leads to incomplete recovery of ant communities in early successional stages. Biological Conservation, 264, 109387. diversity in an agricultural landscape. Royal Society open science, 2(7), 150165.	Weber's length	Mandible length	Head width	Femur length
gallardo_waterinsects	CESTES	aquatic	waterinsect	invertebrate	293.804	0	41.6851	35	2006	2006		abundance	multiple	The Ebro is the largest river in Spain with a water-shed area of 85,362 km2, a length of 910 km and an average annual discharge of 18,138 hm3 (CEDEX 1997). In the last century, regulation of the river to control flooding and water abstraction has reduced the number and extent of permanent water bodies within the floodplain. Most of the floodplain area is used for agricultural or industrial activi…	Google eartch and ref.	Gallardo, B., Gascon, S., García-Antón, M., & Comín, F. A. (2009). Testing the response of macroinvertebrate functional structure and biodiversity to flooding and confinement.	Maximum size (<2.5, 2.5 ≤ 5, 5 ≤ 10, 10 ≤ 20, 20 ≤ 40, 40 ≤ 80, > 80 mm)	Food (sediment + microorganisms, small detritus <1mm, large detritus >1mm, micropredators, macropredators, dead animal, microinvertebrates, macroinvertebrates, vertebrates)	Microhabitat (pebbles, gravel, sand, silt, macrophytes, microphytes, twigs, organic detritus, mud)	Locomotion and substrate relation (Flier, Surface swimmer, Swimmer, Crawler, Burrower, Interstitial, Temporarily attached, Permanently attached)
gracoroza_phytoplankton_1	Distance Decay 2.0	aquatic	microorganism	microorganism	4.47656e+06	1.11226	-14.308	279	2003	2004		abundance	multiple	Data collected in the whole brazilian coastal area. Encompassing multiple land use types	Google earth images	Unpublished	MLD (numeric)	Mucilage, Aerotopes (binary)	Heterocyte, Silica (binary)	Flagella (binary)
gracoroza_phytoplankton_2	Distance Decay 2.0	aquatic	microorganism	microorganism	4.70338e+06	2.02068	-13.6908	307	2003	2004		abundance	multiple	Data collected in the whole brazilian coastal area. Encompassing multiple land use types	Google earth images	Unpublished	MLD (numeric)	Mucilage, Aerotopes (binary)	Heterocyte, Silica (binary)	Flagella (binary)
gracoroza_phytoplankton_3	Distance Decay 2.0	aquatic	microorganism	microorganism	25188	0.260645	-22.6073	348	2015	2015		abundance	multiple	Section from results of the paper: On a cluster-wise consideration, the high values of urban area were found mainly in the Cluster 4, grassland and forest were concentrated in the Clusters 1 and 2, while high values of agriculture areas were found in the Clusters 3 and 6.	Google earth images and ref.	Pacheco, F. S., Miranda, M., Pezzi, L. P., Assireu, A., Marinho, M. M., Malafaia, M., ... & Ometto, J. P. (2017). Water quality longitudinal profile of the Paraíba do Sul River, Brazil during an extreme drought event. Limnology and Oceanography, 62(S1), S131-S146. to flooding and confinement.	MLD, Surface-volume area (sv)	Mucilage, Aerotopes (binary)	Silica (binary)	Flagella (binary)
jeliazkov_waterinsects	CESTES	aquatic	waterinsect	invertebrate	193.872	0.0026584	48.6308	112	2011	2012		abundance	agriculture	We selected 150 ponds out of a total of some 300 ponds in this area on the basis of three main criteria: (1) ponds were surrounded by more than 50% of agricultural land within a radius of 200 m to remain in a context of intensive agriculture while optimising our cross-scale representativeness of all of the ponds in the area; (2) ponds were permanent to avoid major discrepancies in ecological func…	Google earth images	Jeliazkov, A., Chiron, F., Garnier, J., Besnard, A., Silvestre, M., & Jiguet, F. (2014). Level-dependence of the relationships between amphibian biodiversity and environment in pond systems within an intensive agricultural landscape. Hydrobiologia, 723, 7-23.	Body size (1 to 7)	Food type (Microorganisms, Detritus, Dead Plants, Live Microorganisms, Live Macroorganisms, Dead Animals, Live Micro Invertebrates, Live Macro Invertebrates, Vertebrates)	Substrate type (Flags, Gravel, Sand, Silt, Macroorganisms, Microorganisms, Twigs, Organic Material, Mud)	Locomotion type (Flying, Swimming [surface], Swimming [full water column], Crawling, Burrowing, Interstitial, Temporary Attachment, Permanent Attachment)
lee_ants	Google Scholar search	terrestrial	insect	invertebrate	397.852	0.103865	19.1043	141	2016	2016		presence_absence	forest	The authors describe their dataset as agroforestry, I am not sure if this is multiple or forestry, See their methods: During May to August 2016, a total of 12 monoculture rubber plantation (mono-rubber), 9 rubber plantation intercropped with understory shade-tolerance crop Alpinia oxyphylla for a period from 1 to 3 years (agro-rubber), 16 secondary forest and 12 old-growth secondary forest plots …	Google earth images and ref.	Lee, R. H., Wang, C. L. W., & Guénard, B. (2020). The ecological implications of rubber‐based agroforestry: Insect conservation and invasion control. Journal of Applied Ecology, 57(8), 1605-1618.	Weber’s Length (WL)	Mandible Length (ML)	Head Width (HW)	Leg Length (LL)
lehikoinen_birds	Distance Decay 2.0	terrestrial	bird	vertebrate	484310	2.58429	63.167	182	2002	2013		abundance	multiple	The region we cover in the analysis is the whole of Norway and Finland, and the northern two thirds of Sweden (with the southern border including the counties of Värmland, Dalarna and Gävleborg). All routes included are situated north of 58°N (Figure 1). This delimitation largely coincides with the boreal, montane and arctic regions of Fennoscandia, although the coastal areas of southernmost Norw…	Google earth images and ref.	Lindström, Å., Green, M., Husby, M., Kålås, J. A., & Lehikoinen, A. (2015). Large-scale monitoring of waders on their boreal and arctic breeding grounds in northern Europe. Ardea, 103(1), 3-15.	Mass	Diet type (Invertebrates, Vertebrate endotherms, Vertebrate ectotherms, Fish, Vertebrate unknown, Scavengers, Fruits, Nectar, Seeds, Plant Oils)	Foraging stratum (Water below surface, Water around surface, Ground, Understory, Mid-high, Canopy, Aerial)	Migration type (L, R, S)
lowe_spiders	CESTES	terrestrial	insect	invertebrate	904.894	0.00950539	-33.8514	135	2013	2013		abundance	multiple	The title mentions an urban gradient, but the methods section describe different categories for the sites: Sites were categorised into four coarse land-use types: urban parks (n = 4 parks with a total of n = 9 plots), patches of remnant vegetation (n = 7 remnant patches with a total of n = 23 plots), gardens (n = 67) and large areas of continuous bushland (n = 6 bushland sites with a total of n =…	Google earth images and ref.	Lowe, E. C., Threlfall, C. G., Wilder, S. M., & Hochuli, D. F. (2018). Environmental drivers of spider community composition at multiple scales along an urban gradient. Biodiversity and Conservation, 27, 829-852.	Size (small, medium, large)	Hunting style (Ambusher, Cobweb, Foliage runner, Ground runner, Kleptoparasite, Lace web, Orb web, Reduced web, Sheet web)	Foot pads (binary)	Dispersal (binary)
meffert_birds	CESTES	terrestrial	bird	vertebrate	472.785	0.146248	52.5888	30	2007	2007		abundance	urban	The coordinates of this datasets were wrong. However, I remember fixing them before, but apparently this was not incorporated to the original dataset. I have done it now. Anyways, some of the samples are in grasslands, check the attached figure. I keep it as urban because it is mostly within an urban environment anyway. You can decide if we move to multiple. This is how the authors describe their…	Google earth images and ref.	Meffert, P. J., & Dziock, F. (2013). The influence of urbanisation on diversity and trait composition of birds. Landscape Ecology, 28, 943-957.	Body mass (numeric)	Food type (Granivorous, Insectivorous, Omnivorous)	Foraging technique (Ground gleaner, Sit-and-wait predator, Tree/foliage gleaner)	Migration strategy (Sedentary, Short-distance, Long-distance)
N21FBD_2	Distance Decay 2.0	aquatic	microorganism	microorganism	17921.5	1.3121	21.8252	254	2013	2013		abundance	multiple	Sites within urban areas, but also forests and grasslands. We sampled a total of 53 sites from order 2–4 streams during March and April 2013 (Fig. 1). All sites sampled are located in the tributary streams of the upper Mekong River Basin (Fig. 1). We used objective criteria and best professional judgment to select the least disturbed sites as reference sites (as done by Hughes et al., 1986, Stodd…	Google earth images and ref.	Ding, N., Yang, W., Zhou, Y., González-Bergonzoni, I., Zhang, J., Chen, K., ... & Wang, B. (2017). Different responses of functional traits and diversity of stream macroinvertebrates to environmental and spatial factors in the Xishuangbanna watershed of the upper Mekong River Basin, China. Science of the Total Environment, 574, 288-299.	Size class (numeric)	Nitrogen fixer (binary)	Habitat attachment (Adnate, Pedunculate [stalk or pad], Pad attached, Stalk attached)	Mobility (binary)
N21FMI	Distance Decay 2.0	aquatic	waterinsect	invertebrate	17921.1	1.3121	21.829	171	2013	2013		abundance	multiple	Sites within urban areas, but also forests and grasslands. We sampled a total of 53 sites from order 2–4 streams during March and April 2013 (Fig. 1). All sites sampled are located in the tributary streams of the upper Mekong River Basin (Fig. 1). We used objective criteria and best professional judgment to select the least disturbed sites as reference sites (as done by Hughes et al., 1986, Stodd…	Google earth images and ref.	Ding, N., Yang, W., Zhou, Y., González-Bergonzoni, I., Zhang, J., Chen, K., ... & Wang, B. (2017). Different responses of functional traits and diversity of stream macroinvertebrates to environmental and spatial factors in the Xishuangbanna watershed of the upper Mekong River Basin, China. Science of the Total Environment, 574, 288-299.	Size (ordered factor: 1, 2, 3)	Type of food (ordered factor: 1, 2, 3, 4, 5)	Refuge type (ordered factor: 1, 2, 3, 4)	Mode of locomotion (ordered factor: 1, 2, 3, 4, 5, 6)
N25FBD	Distance Decay 2.0	aquatic	microorganism	microorganism	1629.38	0.587725	25.5397	129	2008	2008		abundance	multiple	The Li River Basin (E 110°18′–111°18′; N 25°59′–23°23′) has an area of 6050 km2, and a total length of 229 km (Fig. 1). The Li River originates in the Mao’er Mountain (altitude 1732 m), and flows through Guilin, Yangshuo, and Pingle counties (Cao et al., 2009). The climate is subtropical monsoon (Tang, 2002), with average annual precipitation of 1627 mm and average annual temperature 18–19 °C. Th…	Google earth images and ref.	Chen, K., Hughes, R. M., Xu, S., Zhang, J., Cai, D., & Wang, B. (2014). Evaluating performance of macroinvertebrate-based adjusted and unadjusted multi-metric indices (MMI) using multi-season and multi-year samples. Ecological Indicators, 36, 142-151.	Size class (numeric)	Nitrogen fixer (binary)	Habitat attachment (Adnate, Pedunculate [stalk or pad], Pad attached, Stalk attached)	Mobility (binary)
N25FMI	Distance Decay 2.0	aquatic	waterinsect	invertebrate	3282.48	0.582704	25.5314	154	2008	2008		abundance	multiple	The Li River Basin (E 110°18′–111°18′; N 25°59′–23°23′) has an area of 6050 km2, and a total length of 229 km (Fig. 1). The Li River originates in the Mao’er Mountain (altitude 1732 m), and flows through Guilin, Yangshuo, and Pingle counties (Cao et al., 2009). The climate is subtropical monsoon (Tang, 2002), with average annual precipitation of 1627 mm and average annual temperature 18–19 °C. Th…	Google earth images and ref.	Chen, K., Hughes, R. M., Xu, S., Zhang, J., Cai, D., & Wang, B. (2014). Evaluating performance of macroinvertebrate-based adjusted and unadjusted multi-metric indices (MMI) using multi-season and multi-year samples. Ecological Indicators, 36, 142-151.	Size (ordered factor: 1, 2, 3)	Type of food (ordered factor: 1, 2, 3, 4, 5)	Refuge type (ordered factor: 1, 2, 3, 4)	Mode of locomotion (ordered factor: 1, 2, 3, 4, 5, 6)
N29FBD	Distance Decay 2.0	aquatic	microorganism	microorganism	11028.7	0.551659	29.0395	137	2010	2010		abundance	multiple	This study was carried out in the middle section of the Qiantang River basin, the largest river of Zhejiang Province, China (Fig. 1). The Qiantang River (http://www.zjwater.com) has a drainage area over 55,000 km2, with peak discharge periods in May through June and September, which matches the precipitation patterns of the region (Wang et al., 2012). Urban and agricultural land uses are the majo…	Google earth images and ref.	Liu, S., Xie, G., Wang, L., Cottenie, K., Liu, D., & Wang, B. (2016). Different roles of environmental variables and spatial factors in structuring stream benthic diatom and macroinvertebrate in Yangtze River Delta, China. Ecological indicators, 61, 602-611.	Size class (numeric)	Nitrogen fixer (binary)	Habitat attachment (Adnate, Pedunculate [stalk or pad], Pad attached, Stalk attached)	Mobility (binary)
N29FMI	Distance Decay 2.0	aquatic	waterinsect	invertebrate	11030	0.551659	29.0324	186	2010	2010		abundance	multiple	This study was carried out in the middle section of the Qiantang River basin, the largest river of Zhejiang Province, China (Fig. 1). The Qiantang River (http://www.zjwater.com) has a drainage area over 55,000 km2, with peak discharge periods in May through June and September, which matches the precipitation patterns of the region (Wang et al., 2012). Urban and agricultural land uses are the majo…	Google earth images and ref.	Liu, S., Xie, G., Wang, L., Cottenie, K., Liu, D., & Wang, B. (2016). Different roles of environmental variables and spatial factors in structuring stream benthic diatom and macroinvertebrate in Yangtze River Delta, China. Ecological indicators, 61, 602-611.	Size (ordered factor: 1, 2, 3)	Type of food (ordered factor: 1, 2, 3, 4, 5)	Refuge type (ordered factor: 1, 2, 3, 4)	Mode of locomotion (ordered factor: 1, 2, 3, 4, 5, 6)
N34FBD	Distance Decay 2.0	aquatic	microorganism	microorganism	8116.74	0.00184592	34.1061	172	2013	2013		abundance	multiple	We sampled 48 sites in the tributaries in the southern Wei River watershed (Fig. 1) in June 2013. We used a randomized spatially balanced probabilistic survey design to select all sites to ensure representativeness of the natural, agricultural, and urban land use gradients (Stevens Jr and Olsen 2004; Olsen and Peck 2008). According to the ecological regionalization scheme in China (Fu et al. 2001…	Google earth images and ref.	Yang, W., You, Q., Fang, N., Xu, L., Zhou, Y., Wu, N., ... & Wang, Y. (2018). Assessment of wetland health status of Poyang Lake using vegetation-based indices of biotic integrity. Ecological Indicators, 90, 79-89.	Size class (numeric)	Nitrogen fixer (binary)	Habitat attachment (Adnate, Pedunculate [stalk or pad], Pad attached, Stalk attached)	Mobility (binary)
N34FMI	Distance Decay 2.0	aquatic	waterinsect	invertebrate	8116.43	0.00184592	34.1042	150	2013	2013		abundance	multiple	We sampled 48 sites in the tributaries in the southern Wei River watershed (Fig. 1) in June 2013. We used a randomized spatially balanced probabilistic survey design to select all sites to ensure representativeness of the natural, agricultural, and urban land use gradients (Stevens Jr and Olsen 2004; Olsen and Peck 2008). According to the ecological regionalization scheme in China (Fu et al. 2001…	Google earth images and ref.	Yang, W., You, Q., Fang, N., Xu, L., Zhou, Y., Wu, N., ... & Wang, Y. (2018). Assessment of wetland health status of Poyang Lake using vegetation-based indices of biotic integrity. Ecological Indicators, 90, 79-89.	Size (ordered factor: 1, 2, 3)	Type of food (ordered factor: 1, 2, 3, 4, 5)	Refuge type (ordered factor: 1, 2, 3, 4)	Mode of locomotion (ordered factor: 1, 2, 3, 4, 5, 6)
N38TTP	Distance Decay 2.0	terrestrial	plant	plant	16429.5	0.00894133	37.5481	511	2012	2012		abundance	agriculture	We used plot data from the collaborative vegetation-plot database GrassPlot (Dengler et al., 2018; http://b.link/grassplot), which is registered in the Global Index of Vegetation-Plot Databases (GIVD; Dengler et al., 2011) as EU-00-003. GrassPlot collects vegetation-plot data (both richness and composition) together with methodological, environmental and structural information from grasslands as …	Google earth images and ref.	Dengler, J., Matthews, T. J., Steinbauer, M. J., Wolfrum, S., Boch, S., Chiarucci, A., ... & Biurrun, I. (2020). Species–area relationships in continuous vegetation: Evidence from Palaearctic grasslands. Journal of Biogeography, 47(1), 72-86.	Plant Height (mean)	Specific Leaf Area (SLA) (mean)	Ellenberg values (T, L, F, R, N)	Seed Mass (mean
N39FMI	Distance Decay 2.0	aquatic	waterinsect	invertebrate	296760	0.186505	38.9042	155	2002	2004		abundance	multiple	A total of 95 sites (Fig. 1) which span the entire spectrum of lentic habitats in the region have been sampled, with the exception of reservoirs and coastal salt-pans. Sampling sites were assigned to eight different habitat types on the basis of physicochemistry, origin and hydrology, partly following the classifications of Millán et al. (2002) and Abellán et al. (2005a). These were artificial po…	Google earth images and ref.	Picazo, F., Bilton, D. T., MORENO, J. L., SÁNCHEZ‐FERNÁNDEZ, D. A. V. I. D., & Millan, A. (2012). Water beetle biodiversity in Mediterranean standing waters: assemblage composition, environmental drivers and nestedness patterns. Insect Conservation and Diversity, 5(2), 146-158.	Max size (mm), Min size (mm)	Food type (Primary: fs.m.d, liv.macp, liv.macv, liv.micp, liv.micv, pla.detr; Secondary: fs.m.d, liv.macv, liv.micp, liv.micv, pla.detr, vert)	Feeding habit (Primary: pier, pred, scra, shre; Secondary: pier, pred, shre)	Locomotion (Primary: crawling, diverse swimmer, interstitial, surface swimmer; Secondary: crawling, diverse swimmer, flying, interstitial)
N39FMI_2	Distance Decay 2.0	aquatic	waterinsect	invertebrate	98782.4	1.21618	39.1501	62	2002	2004		abundance	multiple	As in other mediterranean climate regions, the basins have been greatly affected by human activity (Trabaud, 1981), such as agriculture, cattle farming, urbanization, salinization, water utilization and regulation (Conacher & Sala, 1998). All these factors have negatively affected the rivers, either directly or indirectly (Prat & Ward, 1994).	Google earth images and ref.	Bonada, N., Zamora-Muñoz, C., Rieradevall, M., & Prat, N. (2004). Trichoptera (Insecta) collected in Mediterranean river basins of the Iberian Peninsula: taxonomic remarks and notes on ecology. Graellsia, 60(1), 41-69.	Main size (10-20, 2.5-5, 20-40, 5-10), Secondary size (20-40, 5-10)	Food type (Primary: dea.plan, dea.plan/liv.macp, det<1mm, liv.macp, liv.macp/liv.micv, liv.macv, liv.micp, liv.micp/liv.micv, liv.micv; Secondary: det<1mm, liv.macv, dea.anim, liv.macp, dea.plan/liv.micp, det<1mm/liv.micv, liv.micp, liv.micp/liv.micv, dea.anim/dea.plan, det<1mm/liv.micp)	Feeding habit (Primary: Filter, Piercing, Predatory, Scraping, Shredding; Secondary: Filter, Predatory, Scraping, Scraping/Filter, Shredding)	Locomotion (Primary: Crawling, Temporary attachment; Secondary: Burrowing, Crawling, Diverse swimmer, Temporary attachment, Temporary attachment/Burrowing)
N39TTP	Distance Decay 2.0	terrestrial	plant	plant	337315	0.000876895	39.2032	395	2009	2013		abundance	agriculture	We used plot data from the collaborative vegetation-plot database GrassPlot (Dengler et al., 2018; http://b.link/grassplot), which is registered in the Global Index of Vegetation-Plot Databases (GIVD; Dengler et al., 2011) as EU-00-003. GrassPlot collects vegetation-plot data (both richness and composition) together with methodological, environmental and structural information from grasslands as …	Google earth images and ref.	Dengler, J., Matthews, T. J., Steinbauer, M. J., Wolfrum, S., Boch, S., Chiarucci, A., ... & Biurrun, I. (2020). Species–area relationships in continuous vegetation: Evidence from Palaearctic grasslands. Journal of Biogeography, 47(1), 72-86.	Plant Height (mean)	Specific Leaf Area (SLA mean)	Ellenberg Values (Temperature [T], Light [L], Moisture [F], Soil pH [R], Nitrogen [N])	Seed Mass (mean)
N40FMI	Distance Decay 2.0	aquatic	waterinsect	invertebrate	84404	6.10856	39.9714	157	2002	2013	1840-2013	abundance	multiple	Sites across forested areas, grassands, some near cities but no urban sites	Google earth images	Unpublished	Max Size, Min Size	Primary Food (fs.m.d, liv.macp, liv.macv, liv.micp, liv.micv, pla.detr), Secondary Food (fs.m.d, liv.macp, liv.macv, liv.micp, liv.micv, vert)	Primary Feeding Habit (Piercing, Predatory, Scraping, Shredding), Secondary Feeding Habit (Piercing, Predatory, Scraping, Shredding)	Main Locomotion (Crawling, Diverse Swimming, Intermediate, Surface Swimming), Secondary Locomotion (Crawling, Diverse Swimming, Flying, Intermediate)
N41TTP	Distance Decay 2.0	terrestrial	plant	plant	8769	0.010624	40.7423	383	2012	2012		abundance	agriculture	We used plot data from the collaborative vegetation-plot database GrassPlot (Dengler et al., 2018; http://b.link/grassplot), which is registered in the Global Index of Vegetation-Plot Databases (GIVD; Dengler et al., 2011) as EU-00-003. GrassPlot collects vegetation-plot data (both richness and composition) together with methodological, environmental and structural information from grasslands as …	Google earth images and ref	Dengler, J., Matthews, T. J., Steinbauer, M. J., Wolfrum, S., Boch, S., Chiarucci, A., ... & Biurrun, I. (2020). Species–area relationships in continuous vegetation: Evidence from Palaearctic grasslands. Journal of Biogeography, 47(1), 72-86.	Plant Height (mean)	Specific Leaf Area (SLA mean)	Ellenberg Values (Temperature [T], Light [L], Moisture [F], Soil pH [R], Nitrogen [N])	Seed Mass (mean)
N42TTP	Distance Decay 2.0	terrestrial	plant	plant	2451.93	0.0424801	41.7842	83	2004	2008		abundance	multiple	The area is characterized by a mediterranean climate (Blasi 2003) and recent dunes (Holocene) generally occupy a narrow strip along the seashore. They are not very high (usually less than 8–10 m) and are relatively simple in structure, with beaches varying in breadth from a few meters to around 40 m, low embryo dunes, generally only one mobile dune ridge, dune slacks and stabilized dunes. The com…	Google earth images and ref	Carboni, M., Santoro, R., & Acosta, A. T. (2011). Dealing with scarce data to understand how environmental gradients and propagule pressure shape fine‐scale alien distribution patterns on coastal dunes. Journal of Vegetation Science, 22(5), 751-765.	Plant Height (mean)	Specific Leaf Area (SLA mean)	Ellenberg Values (Temperature [T], Light [L], Moisture [F], Soil pH [R], Nitrogen [N])	Seed Mass (mean)
N42TTP_2	Distance Decay 2.0	terrestrial	plant	plant	11171.8	0.0720947	41.8759	147	2007	2008		abundance	multiple	The authors defined this dataset as Quercus suber forest, but some sites are forest fragments within a city. I wonder if this should be classified as forestry or varying	Google earth images and ref.		Plant Height (mean)	Specific Leaf Area (SLA mean)	Ellenberg Values (Temperature [T], Light [L], Moisture [F], Soil pH [R], Nitrogen [N])	Seed Mass (mean)
N42TTP_3	Distance Decay 2.0	terrestrial	plant	plant	406.295	0.0121527	41.8788	337	2012	2012		abundance	agriculture	We used plot data from the collaborative vegetation-plot database GrassPlot (Dengler et al., 2018; http://b.link/grassplot), which is registered in the Global Index of Vegetation-Plot Databases (GIVD; Dengler et al., 2011) as EU-00-003. GrassPlot collects vegetation-plot data (both richness and composition) together with methodological, environmental and structural information from grasslands as …	Google earth images and ref	Dengler, J., Matthews, T. J., Steinbauer, M. J., Wolfrum, S., Boch, S., Chiarucci, A., ... & Biurrun, I. (2020). Species–area relationships in continuous vegetation: Evidence from Palaearctic grasslands. Journal of Biogeography, 47(1), 72-86.	Plant Height (mean)	Specific Leaf Area (SLA mean)	Ellenberg Values (Temperature [T], Light [L], Moisture [F], Soil pH [R], Nitrogen [N])	Seed Mass (mean)
N43TTP_1	Distance Decay 2.0	terrestrial	plant	plant	46333.7	0	43.3135	124	2014	2015		abundance	agriculture	Dune vegetation. Basically all the samples are across beaches. I am not sure how I should classify this dataset. Maybe you can help. This dataset is from sPlot but was not published individually with description of study area.	Google earth images	Torca, M., Campos, J. A., & Herrera, M. (2019). Species composition and plant traits of south Atlantic European coastal dunes and other comparative data. Data in Brief, 22, 207-213.	Plant Height (mean)	Specific Leaf Area (SLA mean)	Ellenberg Values (Temperature [T], Light [L], Moisture [F], Soil pH [R], Nitrogen [N])	Seed Mass (mean)
N43TTP_2	Distance Decay 2.0	terrestrial	plant	plant	38341.2	0	42.9176	350	2008	2009		abundance	forest	The dataset includes original data recently collected at several sites along the Italian Peninsula, basically covering the whole distribution of Stone pine in Italy (excluding islands). At all sites, Pinus pinea was planted approximately 100 years ago. The peculiarity of the data is the semi-natural character of these forests and the vegetation therein.	Google earth images and ref		Plant Height (mean)	Specific Leaf Area (SLA mean)	Ellenberg Values (Temperature [T], Light [L], Moisture [F], Soil pH [R], Nitrogen [N])	Seed Mass (mean)
N43TTP_3	Distance Decay 2.0	terrestrial	plant	plant	6110.09	0	42.7751	596	2014	2014		abundance	agriculture	We used plot data from the collaborative vegetation-plot database GrassPlot (Dengler et al., 2018; http://b.link/grassplot), which is registered in the Global Index of Vegetation-Plot Databases (GIVD; Dengler et al., 2011) as EU-00-003. GrassPlot collects vegetation-plot data (both richness and composition) together with methodological, environmental and structural information from grasslands as …	Google earth images and ref	Dengler, J., Matthews, T. J., Steinbauer, M. J., Wolfrum, S., Boch, S., Chiarucci, A., ... & Biurrun, I. (2020). Species–area relationships in continuous vegetation: Evidence from Palaearctic grasslands. Journal of Biogeography, 47(1), 72-86.	Plant Height (mean)	Specific Leaf Area (SLA mean)	Ellenberg Values (Temperature [T], Light [L], Moisture [F], Soil pH [R], Nitrogen [N])	Seed Mass (mean)
N44TBT	Distance Decay 2.0	terrestrial	insect	invertebrate	71957.2	0.26552	49.6607	128	2004	2006		abundance	multiple	The data comes from Natural reserves, in the CESTES database it is classified as Natural, but we have sites in forest and grasslands sometimes so I keep the varying type. See the text from the methods: Here, we analyse species lists of butterflies recorded in 125 nature reserves in the Czech Republic (Fig. 1), none of them established explicitly for butterfly or even insect conservation, relating…	Google earth images and ref	Bartonova, A., Benes, J., Fric, Z. F., Chobot, K., & Konvicka, M. (2016). How universal are reserve design rules? A test using butterflies and their life history traits. Ecography, 39(5), 456-464.	Body size, Range size	Trophic range	Host plant	Mobility (ordered)
N44TTP	Distance Decay 2.0	terrestrial	plant	plant	10327.7	0	43.9057	873	2016	2016		abundance	agriculture	We used plot data from the collaborative vegetation-plot database GrassPlot (Dengler et al., 2018; http://b.link/grassplot), which is registered in the Global Index of Vegetation-Plot Databases (GIVD; Dengler et al., 2011) as EU-00-003. GrassPlot collects vegetation-plot data (both richness and composition) together with methodological, environmental and structural information from grasslands as …	Google earth images and ref	Dengler, J., Matthews, T. J., Steinbauer, M. J., Wolfrum, S., Boch, S., Chiarucci, A., ... & Biurrun, I. (2020). Species–area relationships in continuous vegetation: Evidence from Palaearctic grasslands. Journal of Biogeography, 47(1), 72-86.	Plant Height (mean)	SLA (Specific Leaf Area, mean)	Light (e_light), Moisture (e_moisture), Nitrogen (e_nitrogen), pH (e_ph), Salt (e_salt), Temperature (e_temp)	Seed Mass (mean)
N47FFI	Distance Decay 2.0	aquatic	fish	vertebrate	77485	1.84566	47.4345	48	2013	2013		abundance	multiple	Some sites within forests, grasslands and cities. The authors describe their datasets as: We sampled altogether 40 sites in a total of 22 wadeable streams in the catchment of Lake Balaton, Hungary (5775 km2), during a 3-year period (between 2008 and 2010). The map of the stream network and a description of the study area can be found in the work of Sály et al. (2011) and will be reiterated here, …	Google earth images and ref.	Erős, T., Takács, P., Specziár, A., Schmera, D. & Sály, P. (2017). Effect of landscape context on fish metacommunity structuring in stream networks. Freshw. Biol., 62, 215–228. Erős, T., Sály, P., Takács, P., Specziár, A. & Bíró, P. (2012). Temporal variability in the spatial and environmental determinants of functional metacommunity organization - stream fish in a human-modified landscape. Fresh…	Maximum Length (mm)	Herbivore (HER), Omnivore (OMN), Plant (PLA), Invertebrate (PIS), Invertebrate (BEN), Predator (PIS)	Pelagic (PEL), Metal (MET), Benthic (BEN)	Littoral (LIT), Phytoplankton (PHY), Phytoplankton/Littoral (PHY_LIT), Passive (PSA), Ostariophysi (OST), Littoral/Pelagic (LIT_PEL), Specialized (SPE)
N47TTP	Distance Decay 2.0	terrestrial	plant	plant	13579.6	0.00318169	47.1062	420	2018	2018		abundance	agriculture	We used plot data from the collaborative vegetation-plot database GrassPlot (Dengler et al., 2018; http://b.link/grassplot), which is registered in the Global Index of Vegetation-Plot Databases (GIVD; Dengler et al., 2011) as EU-00-003. GrassPlot collects vegetation-plot data (both richness and composition) together with methodological, environmental and structural information from grasslands as …	Google earth images and ref	Dengler, J., Matthews, T. J., Steinbauer, M. J., Wolfrum, S., Boch, S., Chiarucci, A., ... & Biurrun, I. (2020). Species–area relationships in continuous vegetation: Evidence from Palaearctic grasslands. Journal of Biogeography, 47(1), 72-86.	Plant Height (mean)	SLA (Specific Leaf Area, mean)	T (Temperature), L (Light), F (Soil moisture), R (Soil reaction), N (Nitrogen)	Seed Mass (mean)
N47TTP_2	Distance Decay 2.0	terrestrial	plant	plant	5721.2	0.00190223	46.5957	389	2009	2009		abundance	agriculture	We used plot data from the collaborative vegetation-plot database GrassPlot (Dengler et al., 2018; http://b.link/grassplot), which is registered in the Global Index of Vegetation-Plot Databases (GIVD; Dengler et al., 2011) as EU-00-003. GrassPlot collects vegetation-plot data (both richness and composition) together with methodological, environmental and structural information from grasslands as …	Google earth images and ref	Dengler, J., Matthews, T. J., Steinbauer, M. J., Wolfrum, S., Boch, S., Chiarucci, A., ... & Biurrun, I. (2020). Species–area relationships in continuous vegetation: Evidence from Palaearctic grasslands. Journal of Biogeography, 47(1), 72-86.	Plant Height (mean)	SLA (Specific Leaf Area, mean)	T (Temperature), L (Light), F (Soil moisture), R (Soil reaction), N (Nitrogen)	Seed Mass (mean)
N48FBD	Distance Decay 2.0	aquatic	microorganism	microorganism	19542.5	0.171608	48.0124	171	2013	2013		abundance	multiple	Land use in the region is dominated by livestock grazing, but much of the upper basin supports natural forest and some metal mining. Over the last 20 years, grassland and unused land have increased, but cultivated land, shrubland, and forestland decreased significantly (Sheng et al., 2010). Increased hydrologic engineering, irrigation, farming, livestock ranching, and mining (Li et al., 2014) hav…		Chen, K., Sun, D., Rajper, A. R., Mulatibieke, M., Hughes, R. M., Pan, Y., ... & Wang, B. (2019). Concordance in biological condition and biodiversity between diatom and macroinvertebrate assemblages in Chinese arid-zone streams. Hydrobiologia, 829, 245-263.	Size class (numeric)	Nitrogen fixer (binary)	Habitat attachment (Adnate, Pedunculate [stalk or pad], Pad attached, Stalk attached)	Mobility (binary)
N48FMI	Distance Decay 2.0	aquatic	waterinsect	invertebrate	19645.1	0.171608	48.0036	74	2013	2013		abundance	multiple	Land use in the region is dominated by livestock grazing, but much of the upper basin supports natural forest and some metal mining. Over the last 20 years, grassland and unused land have increased, but cultivated land, shrubland, and forestland decreased significantly (Sheng et al., 2010). Increased hydrologic engineering, irrigation, farming, livestock ranching, and mining (Li et al., 2014) hav…		Chen, K., Sun, D., Rajper, A. R., Mulatibieke, M., Hughes, R. M., Pan, Y., ... & Wang, B. (2019). Concordance in biological condition and biodiversity between diatom and macroinvertebrate assemblages in Chinese arid-zone streams. Hydrobiologia, 829, 245-263.	Main size (10-20, 2.5-5, 20-40, 5-10), Secondary size (20-40, 5-10)	Food type (Primary: dea.plan, dea.plan/liv.macp, det<1mm, liv.macp, liv.macp/liv.micv, liv.macv, liv.micp, liv.micp/liv.micv, liv.micv; Secondary: det<1mm, liv.macv, dea.anim, liv.macp, dea.plan/liv.micp, det<1mm/liv.micv, liv.micp, liv.micp/liv.micv, dea.anim/dea.plan, det<1mm/liv.micp)	Feeding habit (Primary: Filter, Piercing, Predatory, Scraping, Shredding; Secondary: Filter, Predatory, Scraping, Scraping/Filter, Shredding)	Locomotion (Primary: Crawling, Temporary attachment; Secondary: Burrowing, Crawling, Diverse swimmer, Temporary attachment, Temporary attachment/Burrowing)
N49TBI	Distance Decay 2.0	terrestrial	bird	vertebrate	1.9777e+06	0.0411555	49.3591	73	2012	2013		abundance	forest	The FunDivEurope Exploratory Platform was set up to investigate the effects of tree diversity on multiple forest ecosystem functions in a network of 209 forest plots in Europe (Baeten et al. 2013). The network was established in six forested regions ranging from 40°N to 63°N, separated by ca. 3200 km, and located in Mediterranean (Alto Tajo in Spain and Colline Metallifere in Italy), temperate (H…		Charbonnier, Y. M., Barbaro, L., Barnagaud, J. Y., Ampoorter, E., Nezan, J., Verheyen, K., & Jactel, H. (2016). Bat and bird diversity along independent gradients of latitude and tree composition in European forests. Oecologia, 182, 529-537.	Mass (mean)	Diet (insect, mixed, seeds)	Nest (cavity, ground, shrub, tree)	Home Range (small, mid, large)
N49TBT	Distance Decay 2.0	terrestrial	bat	vertebrate	1.95312e+06	0.0485567	47.53	27	2012	2013		abundance	forest	The FunDivEurope Exploratory Platform was set up to investigate the effects of tree diversity on multiple forest ecosystem functions in a network of 209 forest plots in Europe (Baeten et al. 2013). The network was established in six forested regions ranging from 40°N to 63°N, separated by ca. 3200 km, and located in Mediterranean (Alto Tajo in Spain and Colline Metallifere in Italy), temperate (H…		Charbonnier, Y. M., Barbaro, L., Barnagaud, J. Y., Ampoorter, E., Nezan, J., Verheyen, K., & Jactel, H. (2016). Bat and bird diversity along independent gradients of latitude and tree composition in European forests. Oecologia, 182, 529-537.	Mass (mean)	Diet (generalist, intermediate, specialist)	Nurse Site (build, cave, tree)	Home Range (small, mid, large)
N50TFG	Distance Decay 2.0	terrestrial	fungi	microorganism	2.06985e+06	0	50.5856	314	2001	2014		abundance	forest	This is the Beech boys dataset from by Martin, I had the impression that this was a forest dataset, so I went to check the paper. See if you agree We conducted our study on the continental scale across large parts of the distribution range of beech-dominated forests, including different beech forest types ranging from colline to montane zones. We defined a region as the forest area sampled by the…		Hagge, J., Abrego, N., Bässler, C., Bouget, C., Brin, A., Brustel, H., ... & Müller, J. (2019). Congruent patterns of functional diversity in saproxylic beetles and fungi across European beech forests. Journal of Biogeography, 46(5), 1054-1065.	Size Class	Rot Type (Brown, No rot, Soft, White)	Host Tree (Both, Conifer, Deciduous, Fagaceae)	Spore Volume (µm³)
N51TTP	Distance Decay 2.0	terrestrial	plant	plant	69087.9	0.0060323	50.6994	394	2015	2015		abundance	agriculture	We used plot data from the collaborative vegetation-plot database GrassPlot (Dengler et al., 2018; http://b.link/grassplot), which is registered in the Global Index of Vegetation-Plot Databases (GIVD; Dengler et al., 2011) as EU-00-003. GrassPlot collects vegetation-plot data (both richness and composition) together with methodological, environmental and structural information from grasslands as …		Dengler, J., Matthews, T. J., Steinbauer, M. J., Wolfrum, S., Boch, S., Chiarucci, A., ... & Biurrun, I. (2020). Species–area relationships in continuous vegetation: Evidence from Palaearctic grasslands. Journal of Biogeography, 47(1), 72-86.	Plant Height (mean)	SLA (Specific Leaf Area, mean)	T (Temperature), L (Light), F (Soil moisture), R (Soil reaction), N (Nitrogen)	Seed Mass (mean)
N55TAT	Distance Decay 2.0	terrestrial	insect	invertebrate	141920	0	54.4198	51	2002	2002		abundance	forest	Conifer plantation stands at 12 sites across the UK were selected for study (Fig. 1; Table 1). These comprised four prominent commercial crop types grown in the UK: Sitka spruce (Picea sitchensis L. Bong. Carr.), Scots pine (Pinus sylvestris L.), Corsican pine (Pinus nigra var. maritime L.), and Norway spruce (Picea abies L. Karst.).	Google earth images and ref.	Spake, R., Barsoum, N., Newton, A. C., & Doncaster, C. P. (2016). Drivers of the composition and diversity of carabid functional traits in UK coniferous plantations. Forest Ecology and Management, 359, 300-308.	Length	Diet (collembola, mixed, phyto, predator generalist)	Habitat Affinity (forest, gen, open)	Wing Type (dimorphic, shortwinged, winged)
N55TTP	Distance Decay 2.0	terrestrial	plant	plant	1009.12	0.0116169	54.5554	313	2013	2013		abundance	agriculture	We used plot data from the collaborative vegetation-plot database GrassPlot (Dengler et al., 2018; http://b.link/grassplot), which is registered in the Global Index of Vegetation-Plot Databases (GIVD; Dengler et al., 2011) as EU-00-003. GrassPlot collects vegetation-plot data (both richness and composition) together with methodological, environmental and structural information from grasslands as …	Google earth images and ref.	Dengler, J., Matthews, T. J., Steinbauer, M. J., Wolfrum, S., Boch, S., Chiarucci, A., ... & Biurrun, I. (2020). Species–area relationships in continuous vegetation: Evidence from Palaearctic grasslands. Journal of Biogeography, 47(1), 72-86.	Plant Height (mean)	SLA (Specific Leaf Area, mean)	T (Temperature), L (Light), F (Soil moisture), R (Soil reaction), N (Nitrogen)	Seed Mass (mean)
N62FMI	Distance Decay 2.0	aquatic	waterinsect	invertebrate	85075.1	0.818395	62.861	115	2014	2014		abundance	multiple	This study was based on a dataset collected from 105 stream sites located in western Finland, reaching a spatial extent of 520 km in the north–south and 330 km in the east–west direction (Figure 1). These streams belonged to 21 major river basins draining into the Baltic Sea, mainly into the Gulf of Bothnia, and covered a wide variation in land use, ranging from almost pristine to agricultural la…	Google earth images and ref.	Perez Rocha, M., Bini, L. M., Domisch, S., Tolonen, K. T., Jyrkänkallio‐Mikkola, J., Soininen, J., ... & Heino, J. (2018). Local environment and space drive multiple facets of stream macroinvertebrate beta diversity. Journal of biogeography, 45(12), 2744-2754.	BM (Body Mass)	FFG (Feeding Functional Group)	HTG (Habitat Type Group)	fwl1, fwl2, fwl3, fwl4, fwl5, fwl6, fwl7, fwl8 (Mobility levels)
N69FMI	Distance Decay 2.0	aquatic	waterinsect	invertebrate	4916.64	0.144887	69.6264	106	2012	2012		abundance	forest	The sites are in forested areas along the river. Though the authors make it explicit that forestry is scarce, in our classification, we classify datasets in forested areas as forestry, right? The study area is located in the Tenojoki drainage basin (centred on 70 °N, 26 °E; total basin area: 16386 km2; Fig. 1). The River Tenojoki basin drains large areas in the northernmost Finland and Norway, en…	Google earth images and ref.	Kärnä, O. M., Heino, J., Grönroos, M., & Hjort, J. (2018). The added value of geodiversity indices in explaining variation of stream macroinvertebrate diversity. Ecological Indicators, 94, 420-429.	Size (factor)	FFG (Feeding Functional Group)	HTG (Habitat Type Group)	dis1, dis2, dis3, dis4 (Mobility levels)
ossola_ants	CESTES	terrestrial	insect	invertebrate	93.5787	0.0561678	-38.0264	60	2013	2013		abundance	urban	We therefore investigated the effects of urban habitat complexity upon ant assemblages hypothesising that (i) ant abundance and species richness would be higher in habitats characterized by higher complexity, (ii) the composition of ant assemblages would be significantly different between low- and high-complexity habitats, (iii) based on the size-grain hypothesis, ants living in more complex habi…	Google earth images and ref.	Ossola, A., Nash, M. A., Christie, F. J., Hahs, A. K., & Livesley, S. J. (2015). Urban habitat complexity affects species richness but not environmental filtering of morphologically-diverse ants. PeerJ, 3, e1356.	BSI (Body Size Index)	Generalist, Honeydew/Nectar, Omnivore, Predator, Scavenger, Seed	Head Width	Femur Length
penone_orthoptera	Distance Decay 2.0	terrestrial	insect	invertebrate	2113.22	0.380678	48.8415	8	2009	2009		abundance	urban	To examine the impact of urbanisation, we recorded Orthoptera sounds in 2010 (August 3rd to 13th) along 209 km of five railway lines (41 ± 3 SD km) in the Parisian region, France (see figure F1 in Supporting Information Data S1). Sounds were continuously recorded on a Zoom H2 digital recorder (Samson) at a sampling rate of 96 ks s−1 from the high frequency output of a bat detector (Tranquility Tr…	Google earth images and ref.	Penone, C., Kerbiriou, C., Julien, J. F., Julliard, R., Machon, N., & Le Viol, I. (2013). Urbanisation effect on O rthoptera: which scale matters?. Insect Conservation and Diversity, 6(3), 319-327.	Size Average, Size Min, Size Max	Grass, Shrub, Flower, Seed, Insect	Habitat Specialisation (SSI)	Dispersal Ability
piano_beetles	Co-authors	terrestrial	insect	invertebrate	142.778	2.59616	45.0705	31	2017	2017		abundance	urban	This study was conducted in the metropolitan area of Turin (NW-Italy, approximately 900,000 inhabitants), within 15 km of the city center. The city of Turin was founded by the Romans around the year 50 B.C. and it is located between the Western Alps and the beginning of the Po plain in the region of Piedmont. The altitude ranges between 220 and 280 m a.s.l. and the climate is continental. In orde…	Google earth images and ref.	Piano, E., Bona, F., & Isaia, M. (2020). Urbanization drivers differentially affect ground arthropod assemblages in the city of Turin (NW-Italy). Urban Ecosystems, 23, 617-629.	Body Size	Trophy (OMN, PHY, ZOO)	Habitat (EU, HY, XE)	Disp Class
piano_spiders	Co-authors	terrestrial	insect	invertebrate	142.928	1.48538	45.0673	50	2017	2017		abundance	urban	This study was conducted in the metropolitan area of Turin (NW-Italy, approximately 900,000 inhabitants), within 15 km of the city center. The city of Turin was founded by the Romans around the year 50 B.C. and it is located between the Western Alps and the beginning of the Po plain in the region of Piedmont. The altitude ranges between 220 and 280 m a.s.l. and the climate is continental. In orde…	Google earth images and ref.	Piano, E., Bona, F., & Isaia, M. (2020). Urbanization drivers differentially affect ground arthropod assemblages in the city of Turin (NW-Italy). Urban Ecosystems, 23, 617-629.	Body Size (numeric)	Trophic Category (Hunter, Web-builder)	Habitat (Eurytopic, Hydrophilic, Open, Xerophilic)	Dispersal Class (1-3)
Predicts_cc1_2013_waite_1	PREDICTS	terrestrial	bird	vertebrate	22.0772	0.0491253	-45.8693	18	2009	2010		abundance	urban	The study was undertaken within the residential and commercialarea of Dunedin, on the South Island of New Zealand(45_x000E_5204800S; 170_x000E_2804800E). Dunedin is a coastal city with ahuman population of ~120 000. Typical of the global trend, over90% of the street and reserve trees are non-native, with justfivegenera making up over half the population (Dunedin City Coun-cil, unpubl. data). A to…	Google earth images and ref.	Waite, E., Closs, G. P., van Heezik, Y., & Dickinson, K. J. (2013). Resource availability and foraging of Silvereyes (Zosterops lateralis) in urban trees. Emu-Austral Ornithology, 113(1), 26-32.	Body Mass (g) (numeric)	Trophic Level (Carnivore, Herbivore, Omnivore)	Habitat Breadth IUCN (numeric)	Hand-Wing Index (numeric)
Predicts_db1_2010_dures_1	PREDICTS	terrestrial	bird	vertebrate	1103.62	0.923147	-33.8409	80	2008	2009		abundance	multiple	This study tests our understanding of the mechanisms behind alterations in functional and species diversity driven by urban fragmentation. We explored how, and to what degree, urban-ecological landscape variables (such as location, patch characteristics, and context) influence the functional and species composition of avifauna within fragmented natural remnants. Focusing on Cape Flats Sand Fynbos…	Google earth images and ref.	Dures, S. G., & Cumming, G. S. (2010). The confounding influence of homogenising invasive species in a globally endangered and largely urban biome: Does habitat quality dominate avian biodiversity?. Biological Conservation, 143(3), 768-777.	Body Mass (g) (numeric)	Trophic Level (Carnivore, Herbivore, Omnivore)	Habitat Breadth IUCN (numeric)	Hand-Wing Index (numeric)
Predicts_di1_2004_naidoo_1	PREDICTS	terrestrial	bird	vertebrate	24.4319	0.118828	0.420936	94	2001	2001		abundance	multiple	The study was conducted in and around the Mabira Forest Reserve (0◦30′N, 32◦55′E), a 300 km2remnant of tropical lowland rainforest in southern Uganda (Fig. 1).Study sites were selected in three land-use types in and around the Reserve: intact forest, regenerating forest and smallholder agriculture. Habitat types were identified from land-use maps and Geographic Information System(GIS) coverages c…	Google earth images and ref.	Naidoo, R. (2004, January). Species richness and community composition of songbirds in a tropical forest-agricultural landscape. In Animal Conservation Forum (Vol. 7, No. 1, pp. 93-105). Cambridge University Press.	Body Mass (g) (numeric)	Trophic Level (Carnivore, Herbivore, Omnivore)	Habitat Breadth IUCN (numeric)	Hand-Wing Index (numeric)
Predicts_di1_2010_milder_2	PREDICTS	terrestrial	bird	vertebrate	100.192	0.0717639	14.8485	149	2008	2009		abundance	multiple	We conducted field sampling at 79 points stratified across eight land cover types (Table 1). We sampled ten points per land cover, except live fences, for which only nine suitable sample points could be identified. Within each land cover, five of the sample points were located in zones of low tree cover in the surrounding area (as defined by total tree cover within 400 m of the sample point) whil…	Google earth images and ref.	Milder, J. C., DeCLERCK, F. A., Sanfiorenzo, A., SÁNCHEZ, D. M., Tobar, D. E., & Zuckerberg, B. (2010). Effects of farm and landscape management on bird and butterfly conservation in western Honduras. Ecosphere, 1(1), 1-22.	Body Mass (g) (numeric)	Trophic Level (Carnivore, Herbivore, Omnivore)	Habitat Breadth IUCN (numeric)	Hand-Wing Index (numeric)
Predicts_di1_2011_dawson_1	PREDICTS	terrestrial	bird	vertebrate	41.8294	0.018816	-7.86397	99	2007	2009		abundance	multiple	Survey work was conducted in four major habitat types based on preliminary field assessments: Primary forest, Primary forest edge, Secondary forest edge and Agricultural (Table 1 and Fig. 3).	Google earth images and ref.	Dawson, J., Turner, C., Pileng, O., Farmer, A., McGary, C., Walsh, C., ... & Yosi, C. (2011). Bird communities of the lower Waria Valley, Morobe Province, Papua New Guinea: A comparison between habitat types. Tropical Conservation Science, 4(3), 317-348.	Body Mass (g) (numeric)	Trophic Level (Carnivore, Herbivore, Omnivore)	Habitat Breadth IUCN (numeric)	Hand-Wing Index (numeric)
Predicts_di1_2011_neuschulz_1	PREDICTS	terrestrial	bird	vertebrate	663.72	0.13	-30.4011	90	2008	2009		abundance	forest	We used canopy cover (‘environmental variables’ below) as a criterion for forest modification and human disturbance to classify the six representative forest types: 1) Continuous natural forests (NFor, mean canopy cover 64% ± 10.0 SE): the largest continuous forests that were found within VC and OG Nature Reserve. The sizes of the forest blocks were 130 ha (VC) and 822 ha (OG). 2) Small natural f…	Google earth images and ref.	Neuschulz, E. L., Botzat, A., & Farwig, N. (2011). Effects of forest modification on bird community composition and seed removal in a heterogeneous landscape in South Africa. Oikos, 120(9), 1371-1379.	Body Mass (g) (numeric)	Trophic Level (Carnivore, Herbivore, Omnivore)	Habitat Breadth IUCN (numeric)	Hand-Wing Index (numeric)
Predicts_di1_2012_reid_1	PREDICTS	terrestrial	bird	vertebrate	0.170295	0.0309209	8.79005	177	2007	2007		abundance	forest	This study was conducted from 26 August to 2 October 2007 in a restoration site at Las Cruces Biological Station in Coto Brus County in southern Costa Rica. Melissa’s Meadow (1100 m asl) is a 31‐ha regenerating pasture, which was actively grazed by cattle until 1998 (Fig. 1). At the time of abandonment, Melissa’s Meadow was a pasture dominated by exotic African grasses including Pennisetum purpur…	Google earth images and ref.	Reid, J. L., Harris, J. B. C., & Zahawi, R. A. (2011). Avian Habitat Preference in Tropical Forest Restoration in Southern Costa Rica. Biotropica, 44(3), 350–359. doi:10.1111/j.1744-7429.2011.00814.x	Body Mass (g) (numeric)	Trophic Level (Carnivore, Herbivore, Omnivore)	Habitat Breadth IUCN (numeric)	Hand-Wing Index (numeric)
Predicts_di1_2013_azhar_1	PREDICTS	terrestrial	bird	vertebrate	6725.12	1.27431	3.34276	204	2009	2009		abundance	agriculture	We conducted the study on the west coast of Peninsular Malaysia, in three provincial states: Perak, Selangor and Negeri Sembilan (between 4°29′09″N, 100°42′47″E and 2°29′00″N, 101°56′35″E) (Fig. S1). The areas cultivated with oil palm within these states are 387 214, 135 004 and 165 384 ha, respectively (Malaysia Palm Oil Board 2011). We surveyed 41 plantation estates and 14 smallholdings from Ja…	Google earth images and ref.	Azhar, B., Lindenmayer, D. B., Wood, J., Fischer, J., Manning, A., Mcelhinny, C., & Zakaria, M. (2013). The influence of agricultural system, stand structural complexity and landscape context on foraging birds in oil palm landscapes. Ibis, 155(2), 297–312. doi:10.1111/ibi.12025	Body Mass (g) (numeric)	Trophic Level (Carnivore, Herbivore, Omnivore)	Habitat Breadth IUCN (numeric)	Hand-Wing Index (numeric)
Predicts_dl1_2009_woinarski_1	PREDICTS	terrestrial	bird	vertebrate	11587.3	0.0524569	-13.671	127	2006	2008		abundance	forest	The study focused on areas that sustained or previously sustained eucalypt open forests and savanna woodlands, which were predominantly dominated by Eucalyptus miniata and/or E. tetrodonta. The quadrats were placed within continuous areas of vegetation types (>1 km2) - cleared, regrowth, or intact forest - at a minimum distance of 100 meters from any edge. A total of 100 quadrats were surveyed, i…	Google earth images and ref.	Woinarski, J. C. Z., Rankmore, B., Hill, B., Griffiths, A. D., Stewart, A., & Grace, B. (2009). Fauna assemblages in regrowth vegetation in tropical open forests of the Northern Territory, Australia. Wildlife Research, 36(8), 675. doi:10.1071/wr08128	Body Mass (g) (numeric)	Trophic Level (Carnivore, Herbivore, Omnivore)	Habitat Breadth IUCN (numeric)	Hand-Wing Index (numeric)
Predicts_dl1_2010_proenca_2	PREDICTS	terrestrial	bird	vertebrate	599.157	0.289195	41.9801	38	2005	2005		abundance	forest	We selected patches of oak forest (Q. robur and Q. pyrenaica) and stands of pine and eucalypt according to the following criteria: forest composed of adult trees, with a close canopy (>30% cover) and isolated from other forest patches by a matrix of shrubland or agriculture. The size of forest patches ranged from 0.22 ha to 36.52 ha (Table 1).	Google earth images and ref.	Proença, V. M., Pereira, H. M., Guilherme, J., & Vicente, L. (2010). Plant and bird diversity in natural forests and in native and exotic plantations in NW Portugal. Acta Oecologica, 36(2), 219-226.	Body Mass (g) (numeric)	Trophic Level (Carnivore, Herbivore, Omnivore)	Habitat Breadth IUCN (numeric)	Hand-Wing Index (numeric)
Predicts_dl1_2011_mallari_1	PREDICTS	terrestrial	bird	vertebrate	77.4666	0.162429	10.1668	62	2006	2006		abundance	multiple	In this study, the densities of 18 bird species were estimated in the Puerto Princesa (formerly St Paul’s) Subterranean River National Park on Palawan, Philippines, across various habitats. The study included 17 species that live in the understorey or on the ground, eight of which are endemic and six of which are threatened or Near Threatened. The study also included the endemic and Vulnerable Pa…	Google earth images and ref.	Mallari, N. A. D., Collar, N. J., Lee, D. C., McGowan, P. J. K., Wilkinson, R., & Marsden, S. J. (2011). Population densities of understorey birds across a habitat gradient in Palawan, Philippines: implications for conservation. Oryx, 45(2), 234-242.	Body Mass (g) (numeric)	Trophic Level (Carnivore, Herbivore, Omnivore)	Habitat Breadth IUCN (numeric)	Hand-Wing Index (numeric)
Predicts_dl1_2011_moreno_mateos_1	PREDICTS	terrestrial	bird	vertebrate	311.053	0	38.7541	8	2005	2007		abundance	agriculture	We studied five adjacent 10x10 km squares (500 km2 in total) located in La Mancha, central Spain (38°46′48″N, 3°15′05″E), during three consecutive years (2005–2007). The altitude ranged between 678 and 1013 m asl. The area is a representative mosaic of different crops and semi-natural or introduced woody vegetation that are characteristic of large extents in Mediterranean landscapes. Croplands we…	Google earth images and ref.	Moreno-Mateos, D., Rey Benayas, J. M., Pérez-Camacho, L., Montaña, E. D. L., Rebollo, S., & Cayuela, L. (2011). Effects of land use on nocturnal birds in a Mediterranean agricultural landscape. Acta Ornithologica, 46(2), 173-182.	Body Mass (g) (numeric)	Trophic Level (Carnivore, Herbivore, Omnivore)	Habitat Breadth IUCN (numeric)	Hand-Wing Index (numeric)
Predicts_dl1_2012_dallimer_1	PREDICTS	terrestrial	bird	vertebrate	60.8791	0.747803	1.61094	21	2007	2007		abundance	multiple	Thirteen study sites were visited in 2007, selected to cover three representative habitats on the island (Fig. 1). Six were within primary forest, three in secondary forest and four in agricultural habitats. Primary forest sites were further divided into those at low (up to 300 m), medium (to 500 m) and high (above 500 m) altitudinal bands (Table 2). At each study site, up to 21 survey points wer…	Google earth images and ref.	Dallimer, M., Parnell, M., Bicknell, J. E., & Melo, M. (2012). The importance of novel and agricultural habitats for the avifauna of an oceanic island. Journal for Nature Conservation, 20(4), 191-199. https://doi.org/10.1016/j.jnc.2012.04.001	Body Mass (g) (numeric)	Trophic Level (Carnivore, Herbivore, Omnivore)	Habitat Breadth IUCN (numeric)	Hand-Wing Index (numeric)
Predicts_dl1_2013_bartolommei_1	PREDICTS	terrestrial	bird	vertebrate	1331.03	0.619424	43.0644	6	2008	2008		abundance	multiple	In the title and text, the authors claim that they study an agricultural landscape, but in google earth we find some sites in forested areas, so I suggest using varying. The authors highlight the presence of some conifer plantations, but we agreed that any plantation forest should be treated as forest disturbance, so ... The study area covers about 200 km2, mainly consisting of deciduous forest o…	Google earth images and ref.	Bartolommei, P., Mortelliti, A., Pezzo, F., & Puglisi, L. (2013). Distribution of nocturnal birds (Strigiformes and Caprimulgidae) in relation to land-use types, extent and configuration in agricultural landscapes of Central Italy. Rendiconti Lincei, 24, 13-21.	Body Mass (g) (numeric)	Trophic Level (Carnivore, Herbivore, Omnivore)	Habitat Breadth IUCN (numeric)	Hand-Wing Index (numeric)
Predicts_gp1_2007_kutt_2	PREDICTS	terrestrial	bird	vertebrate	267.186	0.225378	-22.575	72	2001	2001		abundance	forest	This one is controversial to me. The authors wrote in their abstract that the study is in an Eucalyptus woodland, so I assume this is a forest? But looking in google map, it looks very sparsely forested, it looks more like grassland. I will put forestry, but I let you decide. We studied the response of vegetation and vertebrate assemblages to fire and grazing, and their interacting effects, in Eu…	Google earth images and ref.	Kutt, A. S., & Woinarski, J. C. (2007). The effects of grazing and fire on vegetation and the vertebrate assemblage in a tropical savanna woodland in north-eastern Australia. Journal of Tropical Ecology, 23(1), 95-106.	Body Mass (g) (numeric)	Trophic Level (Carnivore, Herbivore, Omnivore)	Habitat Breadth IUCN (numeric)	Hand-Wing Index (numeric)
Predicts_hb1_2001_aumann_1	PREDICTS	terrestrial	bird	vertebrate	11334.5	0	-23.2545	10	2002	2002	1995-1997	abundance	forest	I am also considering this riparian woodland as forest, even if its sparsely forested The study was conducted in an area of approximately 45,000 km2, ranging from 22° to 24°S and 131° to 133°E, centered near Papunya, which is about 250 km west of Alice Springs in the Northern Territory. The study was conducted during December 1994 to December 1997. The climate, topography, vegetation, and human d…	Google earth images and ref.	Aumann, T. (2001). The structure of raptor assemblages in riparian environments in the south-west of the Northern Territory, Australia. Emu, 101(4), 293-304.	Body Mass (g) (numeric)	Trophic Level (Carnivore, Herbivore, Omnivore)	Habitat Breadth IUCN (numeric)	Hand-Wing Index (numeric)
Predicts_hp1_2006_wunderle_1	PREDICTS	terrestrial	bird	vertebrate	0.456832	0	-3.03257	106	2002	2002	2000-2001	abundance	forest	Research was conducted in the Tapajós National Forest (henceforth Tapajós Forest), a 560,000 ha area managed by the Instituto Brasileiro de Meio Ambiente e Recursos Naturais Renovaveis. The Tapajós Forest is located on the east bank of the lower Tapajós River near the mouth of the Tapajós River in the western part of the state of Pará, Brazil (see map in Henriques et al. 2003). The climate, soils…	Google earth images and ref.	Wunderle Jr, J. M., Henriques, L. M. P., & Willig, M. R. (2006). Short‐Term Responses of Birds to Forest Gaps and Understory: An Assessment of Reduced‐Impact Logging in a Lowland Amazon Forest 1. Biotropica: The Journal of Biology and Conservation, 38(2), 235-255.	Body Mass (g) (numeric)	Trophic Level (Carnivore, Herbivore, Omnivore)	Habitat Breadth IUCN (numeric)	Hand-Wing Index (numeric)
Predicts_hp1_2007_borges_1	PREDICTS	terrestrial	bird	vertebrate	86.4314	0.568919	-1.87459	105	2003	2003		abundance	forest	Twelve sites in secondary forest (four sites in three age categories) and 12 sites in primary forest were selected for bird sampling	Google earth images and ref.	Borges, S. H. (2007). Bird assemblages in secondary forests developing after slash-and-burn agriculture in the Brazilian Amazon. Journal of Tropical Ecology, 23(4), 469-477.	Body Mass (g) (numeric)	Trophic Level (Carnivore, Herbivore, Omnivore)	Habitat Breadth IUCN (numeric)	Hand-Wing Index (numeric)
Predicts_hp1_2007_ranganathan_1	PREDICTS	terrestrial	bird	vertebrate	74.2763	0.116974	8.79449	166	2002	2002		presence_absence	multiple	We measured patterns of bird diversity and land cover at 12 sites, each defined as the area circumscribed by a 300 m radius from the boundary of a small, discrete, central forest fragment (Fig. 1; average fragment area 3.1 ± 0.6 ha, average site area 54.2 ± 2.9 ha; measurements are expressed as mean ± SE). All forest fragments were separated from all others by at least 1 km. Differences in site a…	Google earth images and ref.	Ranganathan, J., Chan, K. M., & Daily, G. C. (2007). Satellite detection of bird communities in tropical countryside. Ecological Applications, 17(5), 1499-1510.	Body Mass (g) (numeric)	Trophic Level (Carnivore, Herbivore, Omnivore)	Habitat Breadth IUCN (numeric)	Hand-Wing Index (numeric)
Predicts_hp1_2007_shahabuddin_1	PREDICTS	terrestrial	bird	vertebrate	80.6036	0.230937	27.3335	84	2002	2002		abundance	forest	The area is covered by forests formally known as tropical dry forests of two categories – tropical dry deciduous forests and tropical thorn forests (Champion & Seth, 1968) – found in three distinct associations: dry deciduous forest along the hill slopes, mixed deciduous riparian forest occurring along streams and scrub forest in the dry plains areas (G. Shahabuddin & R. Kumar, pers. obs.; Govern…	Google earth images and ref.	Shahabuddin, G., & Kumar, R. (2007). Effects of extractive disturbance on bird assemblages, vegetation structure and floristics in tropical scrub forest, Sariska Tiger Reserve, India. Forest Ecology and Management, 246(2-3), 175-185.	Body Mass (g) (numeric)	Trophic Level (Carnivore, Herbivore, Omnivore)	Habitat Breadth IUCN (numeric)	Hand-Wing Index (numeric)
Predicts_hp1_2008_farwig_1	PREDICTS	terrestrial	bird	vertebrate	60.6515	0.218992	0.275028	113	2005	2006		abundance	forest	We sampled birds in five forest types, i.e. natural forest, plantations of a mixture of indigenous tree species (in the following mixed indigenous), monocultures of the indigenous tree M. eminii (in the following indigenous monoculture), monocultures of the exotic tree B. javanica (in the following exotic monoculture) and in secondary forest.	Google earth images and ref.	Farwig, N., Sajita, N., & Böhning-Gaese, K. (2008). Conservation value of forest plantations for bird communities in western Kenya. Forest Ecology and Management, 255(11), 3885-3892.	Body Mass (g) (numeric)	Trophic Level (Carnivore, Herbivore, Omnivore)	Habitat Breadth IUCN (numeric)	Hand-Wing Index (numeric)
Predicts_hp1_2008_ranganathan_1	PREDICTS	terrestrial	bird	vertebrate	231.209	1.08453	14.4	114	2004	2004		presence_absence	forest	This one says in the title agriculture, but it is palm plantation, so trees... I am considering it as forestry Here, we quantify the bird diversity affiliated with agricultural systems in southwest India, a region continuously cultivated for >2,000 years. We show that arecanut palm (Areca catechu) production systems retain 90% of the bird species associated with regional native forest. Two factor…	Google earth images and ref.	Ranganathan, J., Daniels, R. R., Chandran, M. S., Ehrlich, P. R., & Daily, G. C. (2008). Sustaining biodiversity in ancient tropical countryside. Proceedings of the National Academy of Sciences, 105(46), 17852-17854.	Body Mass (g) (numeric)	Trophic Level (Carnivore, Herbivore, Omnivore)	Habitat Breadth IUCN (numeric)	Hand-Wing Index (numeric)
Predicts_hp1_2009_kessler_5	PREDICTS	terrestrial	bird	vertebrate	6.98595	0.292515	-1.5024	87	2007	2007		abundance	forest	The study sites were located in the northern part of Napu Valley in the vicinity of the villages Kamarora and Wuasa, at elevations between 900 m and 1200 m asl. Three or four replicate sites were selected in each of the four studied habitat types: primary forest, forest gardens, ca. 5 years old secondary forest, and cacao plantations.	Google earth images and ref.	Kessler, M., Keßler, P. J., Gradstein, S. R., Bach, K., Schmull, M., & Pitopang, R. (2005). Tree diversity in primary forest and different land use systems in Central Sulawesi, Indonesia. Biodiversity & Conservation, 14, 547-560.	Body Mass (g) (numeric)	Trophic Level (Carnivore, Herbivore, Omnivore)	Habitat Breadth IUCN (numeric)	Hand-Wing Index (numeric)
Predicts_hp1_2010_bicknell_1	PREDICTS	terrestrial	bird	vertebrate	330.269	0.323501	4.7129	5	2008	2008		abundance	forest	Six sites were surveyed, comprising three logged and three unlogged (Fig. 1). All three unlogged sites were within the Iwokrama protected area. One logged site was also within the Iwokrama ‘Sustainable Utilisation Area’ and the two remaining logged sites were part of the DTL concession.	Google earth images and ref.	Bicknell, J., & Peres, C. A. (2010). Vertebrate population responses to reduced-impact logging in a neotropical forest. Forest Ecology and Management, 259(12), 2267-2275.	Body Mass (g) (numeric)	Trophic Level (Carnivore, Herbivore, Omnivore)	Habitat Breadth IUCN (numeric)	Hand-Wing Index (numeric)
Predicts_hp1_2010_bicknell_2	PREDICTS	terrestrial	bird	vertebrate	330.554	0.323501	4.7129	21	2008	2008		abundance	forest	Six sites were surveyed, comprising three logged and three unlogged (Fig. 1). All three unlogged sites were within the Iwokrama protected area. One logged site was also within the Iwokrama ‘Sustainable Utilisation Area’ and the two remaining logged sites were part of the DTL concession.	Google earth images and ref.	Bicknell, J., & Peres, C. A. (2010). Vertebrate population responses to reduced-impact logging in a neotropical forest. Forest Ecology and Management, 259(12), 2267-2275.	Body Mass (g) (numeric)	Trophic Level (Carnivore, Herbivore, Omnivore)	Habitat Breadth IUCN (numeric)	Hand-Wing Index (numeric)
Predicts_hw1_2005_baldi_1	PREDICTS	terrestrial	bird	vertebrate	2503.53	0.149853	47.1151	72	2003	2003		abundance	agriculture	We selected field pairs with high and low grazing pressure in the vicinity of each other. Therefore, the systematic differences of fields within pairs can be attributed to the intensity of grazing, and other environmental factors may have little effect. Similar paired-field designs were already successfully used in other studies (e.g. Kleijn et al., 2001, Suominen et al., 2003). Each region had s…	Google earth images and ref.	Báldi, A., Batáry, P., & Erdős, S. (2005). Effects of grazing intensity on bird assemblages and populations of Hungarian grasslands. Agriculture, ecosystems & environment, 108(3), 251-263.	Body Mass (g) (numeric)	Trophic Level (Carnivore, Herbivore, Omnivore)	Habitat Breadth IUCN (numeric)	Hand-Wing Index (numeric)
Predicts_hw1_2007_chapman_1	PREDICTS	terrestrial	bird	vertebrate	2841.27	0	45.3305	92	2002	2002	2000	abundance	multiple	We sampled birds, vegetation, and environmental variables in the 5000 km2 study region simultaneously along two gradients: intensifying land use and increasing canopy cover. The land-use intensification gradient in the study region was represented by minimally used reserves (a subset of Marzluff et al.’s (2001) “wildlands”), moderately used rural lands, and intensively used suburbs. We did not sa…	Google earth images and ref.	Chapman, K. A., & Reich, P. B. (2007). Land use and habitat gradients determine bird community diversity and abundance in suburban, rural and reserve landscapes of Minnesota, USA. Biological Conservation, 135(4), 527-541.	Body Mass (g) (numeric)	Trophic Level (Carnivore, Herbivore, Omnivore)	Habitat Breadth IUCN (numeric)	Hand-Wing Index (numeric)
Predicts_hw1_2008_lantschner_1	PREDICTS	terrestrial	bird	vertebrate	5174.54	0	-40.8821	38	2001	2002		abundance	multiple	Plantations in the region comprise mainly of three species: ponderosa pine (Pinus ponderosa), lodgepole pine (Pinus contorta) and douglas fir (Pseudotsuga menziesii). We selected three situations (treatments) in both steppe and A. chilensis forest habitats (Fig. 1): Dense pine plantations: ponderosa pine plantations, where tree density was high, the herbaceous-shrubby cover was less than 15%, and…	Google earth images and ref.	Lantschner, M. V., Rusch, V., & Peyrou, C. (2008). Bird assemblages in pine plantations replacing native ecosystems in NW Patagonia. Biodiversity and Conservation, 17(5), 969-989.	Body Mass (g) (numeric)	Trophic Level (Carnivore, Herbivore, Omnivore)	Habitat Breadth IUCN (numeric)	Hand-Wing Index (numeric)
Predicts_hw1_2011_cerezo_1	PREDICTS	terrestrial	bird	vertebrate	10556.5	0.00183186	-34.3608	102	2005	2006		abundance	agriculture	Bird surveys were carried out along transects established using a stratified design. An 8 km × 8 km grid was placed over a land-cover classification for the study region. The four strata were defined based on five landscape indices (class area, number of patches, mean patch size, coefficient of variation in patch size, total edge, and mean patch shape index), calculated for five land-cover classe…	Google earth images and ref.	Cerezo, A., Conde, M. C., & Poggio, S. L. (2011). Pasture area and landscape heterogeneity are key determinants of bird diversity in intensively managed farmland. Biodiversity and Conservation, 20, 2649-2667.	Body Mass (g) (numeric)	Trophic Level (Carnivore, Herbivore, Omnivore)	Habitat Breadth IUCN (numeric)	Hand-Wing Index (numeric)
Predicts_hw1_2012_naoe_1	PREDICTS	terrestrial	bird	vertebrate	0.209809	0	36.9412	41	2006	2007		abundance	forest	We surveyed the species composition and density of forest birds in two forests: the relatively continuous Ogawa Forest Reserve (OFR; ca. 98 ha) and strip-shaped fragmented forest nearby (FRG; ca. 29 ha) (Fig. 1). OFR and FRG were once a single old-growth forest. However, large parts of the forest were clear-cut from the 1960s to the 1980s and converted mainly into evergreen conifer plantations, w…	Google earth images and ref.	Naoe, S., Sakai, S., & Masaki, T. (2012). Effect of forest shape on habitat selection of birds in a plantation-dominant landscape across seasons: Comparison between continuous and strip forests. Journal of Forest Research, 17(2), 219-223.	Body Mass (g) (numeric)	Trophic Level (Carnivore, Herbivore, Omnivore)	Habitat Breadth IUCN (numeric)	Hand-Wing Index (numeric)
Predicts_hw1_2012_naoe_2	PREDICTS	terrestrial	bird	vertebrate	0.207951	0	36.9412	26	2006	2007		abundance	forest	We surveyed the species composition and density of forest birds in two forests: the relatively continuous Ogawa Forest Reserve (OFR; ca. 98 ha) and strip-shaped fragmented forest nearby (FRG; ca. 29 ha) (Fig. 1). OFR and FRG were once a single old-growth forest. However, large parts of the forest were clear-cut from the 1960s to the 1980s and converted mainly into evergreen conifer plantations, w…	Google earth images and ref.	Naoe, S., Sakai, S., & Masaki, T. (2012). Effect of forest shape on habitat selection of birds in a plantation-dominant landscape across seasons: Comparison between continuous and strip forests. Journal of Forest Research, 17(2), 219-223.	Body Mass (g) (numeric)	Trophic Level (Carnivore, Herbivore, Omnivore)	Habitat Breadth IUCN (numeric)	Hand-Wing Index (numeric)
Predicts_hz1_2012_kutt_1	PREDICTS	terrestrial	bird	vertebrate	5.50616	0	-20.5441	81	2002	2004	1999-2004	abundance	agriculture	This study was carried out in a tropical savannah and they test different grazing levels; I assumed that grazing is an agricultural practice so I classify as agriculture, but I wonder if you would say forestry is more appropriate Sixteen 1-ha sites were established, comprising two within each of four replicated treatment paddocks (moderate, heavy, and rotational and variable stocking rates). All …	Google earth images and ref.	Kutt, A. S., Vanderduys, E. P., & O’Reagain, P. (2012). Spatial and temporal effects of grazing management and rainfall on the vertebrate fauna of a tropical savanna. The Rangeland Journal, 34(2), 173. doi:10.1071/rj11049	Body Mass (g) (numeric)	Trophic Level (Carnivore, Herbivore, Omnivore)	Habitat Breadth IUCN (numeric)	Hand-Wing Index (numeric)
Predicts_jd1_2002_pearman_1	PREDICTS	terrestrial	bird	vertebrate	6.06416	0	-1.06852	96	2002	2002	1994	presence_absence	multiple	The study was conducted at the Jatun Sacha Biological Station and reserve in the Upper Amazon Basin in Ecuador, with fieldwork taking place between October 1993 and April 1995. The location of the reserve is at 450 meters elevation, with coordinates of 1°03' S and 77°35' W, lying -25 km east of the Andes. The area is characterized by "Tropical Wet Forest" according to Holdridge's classification s…	Google earth images and ref.	Pearman, P. B. (2002). The scale of community structure: habitat variation and avian guilds in tropical forest understory. Ecological monographs, 72(1), 19-39.	Body Mass (g) (numeric)	Trophic Level (Carnivore, Herbivore, Omnivore)	Habitat Breadth IUCN (numeric)	Hand-Wing Index (numeric)
Predicts_jd1_2010_wang_1	PREDICTS	terrestrial	bird	vertebrate	105.684	0.138774	29.5321	93	2006	2006		presence_absence	forest	The Thousand Island Lake (hereafter TIL) (29°22″– 29°50″ N, 118° 34″– 119° 15″ E) was created in 1959 by the damming of the Xinanjiang River in western Zhejiang Province for the purpose of generating hydroelectricity (Fig. 1). With construction of the Xinanjiang dam, an area of approximately 580 km2 was inundated, creating 1078 islands (0.25–1320 ha) out of former hilltops when the water reached …	Google earth images and ref.	Wang, Y., Bao, Y., Yu, M., Xu, G., & Ding, P. (2010). BIODIVERSITY RESEARCH: Nestedness for different reasons: the distributions of birds, lizards and small mammals on islands of an inundated lake. Diversity and distributions, 16(5), 862-873.	Body Mass (g) (numeric)	Trophic Level (Carnivore, Herbivore, Omnivore)	Habitat Breadth IUCN (numeric)	Hand-Wing Index (numeric)
Predicts_ks1_2005_pons_1	PREDICTS	terrestrial	bird	vertebrate	2205.68	0	-16.2014	52	2002	2002	1994	abundance	forest	Fourteen study areas (Fig. 1), consisting of three to nine nearby sampling sites each, were distributed within the region. This totalled 73 sampling sites located in areas of homogeneous vegetation on sandy soil, according to three broad categories: unburned forest (n = 32), burned forest (n = 20) and savanna (n = 21).	Google earth images and ref.	Pons, P., & Wendenburg, C. (2005). The impact of fire and forest conversion into savanna on the bird communities of West Madagascan dry forests. Animal Conservation, 8(2), 183–193. doi:10.1017/s1367943005001940	Body Mass (g) (numeric)	Trophic Level (Carnivore, Herbivore, Omnivore)	Habitat Breadth IUCN (numeric)	Hand-Wing Index (numeric)
Predicts_ks1_2009_suarez_rubio_1	PREDICTS	terrestrial	bird	vertebrate	262.827	0.485322	18.3584	54	2004	2005		abundance	multiple	I find this one tricky because they sample forest within urbanized areas, so the forest patches are often within highly urbanized areas. The people from PREDICTS classified this dataset as URBAN, but I suggest MULTIPLE. You may have a different opinion. We conducted this study in the San Juan metropolitan area (between 18 150 N, 66 150 W and 18 300 N, 66 520 30”W) of northern Puerto Rico (Fig. 1)…	Google earth images and ref.	Suarez-Rubio, M., & Thomlinson, J. R. (2009). Landscape and patch-level factors influence bird communities in an urbanized tropical island. Biological Conservation, 142(7), 1311–1321. doi:10.1016/j.biocon.2008.12.0	Body Mass (g) (numeric)	Trophic Level (Carnivore, Herbivore, Omnivore)	Habitat Breadth IUCN (numeric)	Hand-Wing Index (numeric)
Predicts_mh1_2010_sheldon_1	PREDICTS	terrestrial	bird	vertebrate	221.307	0	4.63954	149	2005	2005		abundance	forest	Sabah Softwoods plantation is located in the Kalabakan Forest Reserve in southeastern Sabah, East Malaysia, about 50 km NNW of Tawau. The plantation was established in 1974 after the area was logged from the 1960s to 1980s. The plantation consists of two parts: the Brumas section (41,505 ha) and the Kalabakan section (19,113 ha). The research conducted for this study was carried out in the Brumas…	Google earth images and ref.	Sheldon, F. H., Styring, A., & Hosner, P. A. (2010). Bird species richness in a Bornean exotic tree plantation: A long-term perspective. Biological Conservation, 143(2), 399–407. doi:10.1016/j.biocon.2009.11.0	Body Mass (g) (numeric)	Trophic Level (Carnivore, Herbivore, Omnivore)	Habitat Breadth IUCN (numeric)	Hand-Wing Index (numeric)
Predicts_mh1_2011_phalan_1	PREDICTS	terrestrial	bird	vertebrate	2562.37	0.583157	5.4297	136	2007	2007		abundance	forest	I would say multiple because cassava plantations are not trees and based on our conversation, these should be considered as agriculture. They also have agroforestry, which should be classified as forestry, so to me, MULTIPLE fits. In Ghana, fieldwork was conducted in 2006–2007. The study province was taken as the whole of seven administrative districts (Wassa West, Ahanta West, Mpohor Wassa East,…	Google earth images and ref.	Phalan, B., Onial, M., Balmford, A., & Green, R. E. (2011). Reconciling food production and biodiversity conservation: land sharing and land sparing compared. science, 333(6047), 1289-1291.	Body Mass (g) (numeric)	Trophic Level (Carnivore, Herbivore, Omnivore)	Habitat Breadth IUCN (numeric)	Hand-Wing Index (numeric)
Predicts_mj1_2008_munyekenye_1	PREDICTS	terrestrial	bird	vertebrate	71.7638	0.00690856	0.285327	128	2004	2005		abundance	forest	Different forest types, namely primary, secondary (regeneration), M. eminii plantation, B. javanica plantation, P. guajava, and plantations of mixed indigenous and exotic species were identified during the preliminary survey of the study area. Three plots of 3.24 hectares were randomly selected in each of the forest types for uniformity except in the P. guajava plantation where only two plots wer…	Google earth images and ref.	Munyekenye, F., Mwangi, E., & Gichuki, N. (2008). Bird species richness and abundance in different forest types at Kakamega Forest, western Kenya. Ostrich, 79(1), 37–42. doi:10.2989/ostrich.2008.79.1	Body Mass (g) (numeric)	Trophic Level (Carnivore, Herbivore, Omnivore)	Habitat Breadth IUCN (numeric)	Hand-Wing Index (numeric)
Predicts_mj1_2009_lehouck_1	PREDICTS	terrestrial	bird	vertebrate	24.0556	0.0109936	-3.43461	18	2004	2004		abundance	forest	The study took place in the Taita Hills, located in southeastern Kenya at coordinates 03820?S, 38815?E and altitudes ranging from 1200 to 2230 meters. The area is part of the Northern Eastern Arc Mountains and experiences rainfall ranging from 500 to 1200 mm per year, with two rainy seasons intersected by a short dry period in February and a long one from June to September. The region has year-ro…	Google earth images and ref.	Lehouck, V., Spanhove, T., Colson, L., Adringa-Davis, A., Cordeiro, N. J., & Lens, L. (2009). Habitat disturbance reduces seed dispersal of a forest interior tree in a fragmented African cloud forest. Oikos, 118(7), 1023–1034. doi:10.1111/j.1600-0706.2009.17300.x	Body Mass (g) (numeric)	Trophic Level (Carnivore, Herbivore, Omnivore)	Habitat Breadth IUCN (numeric)	Hand-Wing Index (numeric)
Predicts_mj1_2009_lehouck_2	PREDICTS	terrestrial	bird	vertebrate	6.52622	0.0644583	-3.45238	7	2006	2006		abundance	forest	The study took place in the Taita Hills, located in southeastern Kenya at coordinates 03820?S, 38815?E and altitudes ranging from 1200 to 2230 meters. The area is part of the Northern Eastern Arc Mountains and experiences rainfall ranging from 500 to 1200 mm per year, with two rainy seasons intersected by a short dry period in February and a long one from June to September. The region has year-ro…	Google earth images and ref.	Lehouck, V., Spanhove, T., Colson, L., Adringa-Davis, A., Cordeiro, N. J., & Lens, L. (2009). Habitat disturbance reduces seed dispersal of a forest interior tree in a fragmented African cloud forest. Oikos, 118(7), 1023–1034. doi:10.1111/j.1600-0706.2009.17300.x	Body Mass (g) (numeric)	Trophic Level (Carnivore, Herbivore, Omnivore)	Habitat Breadth IUCN (numeric)	Hand-Wing Index (numeric)
Predicts_mj1_2009_lehouck_3	PREDICTS	terrestrial	bird	vertebrate	20.3085	0.0155629	-3.42844	26	2004	2004		abundance	forest	The study took place in the Taita Hills, located in southeastern Kenya at coordinates 03820?S, 38815?E and altitudes ranging from 1200 to 2230 meters. The area is part of the Northern Eastern Arc Mountains and experiences rainfall ranging from 500 to 1200 mm per year, with two rainy seasons intersected by a short dry period in February and a long one from June to September. The region has year-ro…	Google earth images and ref.	Lehouck, V., Spanhove, T., Colson, L., Adringa-Davis, A., Cordeiro, N. J., & Lens, L. (2009). Habitat disturbance reduces seed dispersal of a forest interior tree in a fragmented African cloud forest. Oikos, 118(7), 1023–1034. doi:10.1111/j.1600-0706.2009.17300.x	Body Mass (g) (numeric)	Trophic Level (Carnivore, Herbivore, Omnivore)	Habitat Breadth IUCN (numeric)	Hand-Wing Index (numeric)
Predicts_mj1_2009_lehouck_4	PREDICTS	terrestrial	bird	vertebrate	20.3169	0.0155629	-3.42513	26	2005	2005		abundance	forest	The study took place in the Taita Hills, located in southeastern Kenya at coordinates 03820?S, 38815?E and altitudes ranging from 1200 to 2230 meters. The area is part of the Northern Eastern Arc Mountains and experiences rainfall ranging from 500 to 1200 mm per year, with two rainy seasons intersected by a short dry period in February and a long one from June to September. The region has year-ro…	Google earth images and ref.	Lehouck, V., Spanhove, T., Colson, L., Adringa-Davis, A., Cordeiro, N. J., & Lens, L. (2009). Habitat disturbance reduces seed dispersal of a forest interior tree in a fragmented African cloud forest. Oikos, 118(7), 1023–1034. doi:10.1111/j.1600-0706.2009.17300.x	Body Mass (g) (numeric)	Trophic Level (Carnivore, Herbivore, Omnivore)	Habitat Breadth IUCN (numeric)	Hand-Wing Index (numeric)
Predicts_mj1_2009_lehouck_5	PREDICTS	terrestrial	bird	vertebrate	20.3538	0.0155629	-3.42513	25	2006	2006		abundance	forest	The study took place in the Taita Hills, located in southeastern Kenya at coordinates 03820?S, 38815?E and altitudes ranging from 1200 to 2230 meters. The area is part of the Northern Eastern Arc Mountains and experiences rainfall ranging from 500 to 1200 mm per year, with two rainy seasons intersected by a short dry period in February and a long one from June to September. The region has year-ro…	Google earth images and ref.	Lehouck, V., Spanhove, T., Colson, L., Adringa-Davis, A., Cordeiro, N. J., & Lens, L. (2009). Habitat disturbance reduces seed dispersal of a forest interior tree in a fragmented African cloud forest. Oikos, 118(7), 1023–1034. doi:10.1111/j.1600-0706.2009.17300.x	Body Mass (g) (numeric)	Trophic Level (Carnivore, Herbivore, Omnivore)	Habitat Breadth IUCN (numeric)	Hand-Wing Index (numeric)
Predicts_mj1_2013_ndanganga_1	PREDICTS	terrestrial	bird	vertebrate	950.485	0.150126	0.42297	66	2010	2011		abundance	multiple	Within each of the two subdistricts, 5 km x 5 km study sites (three in Nyandarua south and two in Nyandarua north) were systematically selected from a map to represent varying human population densities (Figure 1a). Within each study site, 30-metre-radius sampling plots were identified along 1 km transects (Table 1). Transects were semi-randomly located through first identifying one or two access…	Google earth images and ref.	Ndang’ang’a, P. K., Njoroge, J. B., & Githiru, M. (2013). Vegetation composition and structure influences bird species community assemblages in the highland agricultural landscape of Nyandarua, Kenya. Ostrich, 84(3), 171–179. doi:10.2989/00306525.2013.8609	Body Mass (g) (numeric)	Trophic Level (Carnivore, Herbivore, Omnivore)	Habitat Breadth IUCN (numeric)	Hand-Wing Index (numeric)
Predicts_mj1_2013_ndanganga_2	PREDICTS	terrestrial	bird	vertebrate	944.12	0.240929	0.303872	62	2011	2012		abundance	multiple	Within each of the two subdistricts, 5 km x 5 km study sites (three in Nyandarua south and two in Nyandarua north) were systematically selected from a map to represent varying human population densities (Figure 1a). Within each study site, 30-metre-radius sampling plots were identified along 1 km transects (Table 1). Transects were semi-randomly located through first identifying one or two access…	Google earth images and ref.	Ndang’ang’a, P. K., Njoroge, J. B., & Githiru, M. (2013). Vegetation composition and structure influences bird species community assemblages in the highland agricultural landscape of Nyandarua, Kenya. Ostrich, 84(3), 171–179. doi:10.2989/00306525.2013.8609	Body Mass (g) (numeric)	Trophic Level (Carnivore, Herbivore, Omnivore)	Habitat Breadth IUCN (numeric)	Hand-Wing Index (numeric)
Predicts_mj1_2013_reynolds_1	PREDICTS	terrestrial	bird	vertebrate	11.6118	0.105904	-29.4858	77	2010	2011		abundance	agriculture	The study area is located in the Mistbelt grasslands of KwaZulu-Natal (KZN), South Africa (29°28’S, 29°51’E; 1760–1870 m a.s.l.) and covers approximately 1500 ha. The area receives an annual rainfall of 800–1200 mm, annual temperatures range from –2°C to 38°C, and dense mist occurs frequently (Wakelin & Hill 2007; Birdlife International 2010). The vegetation is classified as KwaZulu-Natal Mistbel…	Google earth images and ref.	Reynolds, C., & Symes, C. T. (2013). Grassland Bird Response to Vegetation Structural Heterogeneity and Clearing of Invasive Bramble. African Zoology, 48(2), 228–239. doi:10.3377/004.048.0217	Body Mass (g) (numeric)	Trophic Level (Carnivore, Herbivore, Omnivore)	Habitat Breadth IUCN (numeric)	Hand-Wing Index (numeric)
Predicts_sc1_2005_marsh_1	PREDICTS	terrestrial	bird	vertebrate	391.01	0	-11.7139	27	2005	2005		abundance	forest	We surveyed butterfly and bird communities at 45 sites across Anjouan, stratified by habitat and altitude. There were 15 sites in mature forest, 15 in disturbed forest, and 15 in non-forest. Disturbed forest included secondary forest, forest underplanted with crops or non-native tree species, and forest degraded by firewood and fodder collection and logging. Non-forest sites encompassed plantatio…	Google earth images and ref.	Marsh, C. J., Lewis, O. T., Said, I., & Ewers, R. M. (2010). Community-level diversity modelling of birds and butterflies on Anjouan, Comoro Islands. Biological Conservation, 143(6), 1364–1374. doi:10.1016/j.biocon.2010.03.0	Body Mass (g) (numeric)	Trophic Level (Carnivore, Herbivore, Omnivore)	Habitat Breadth IUCN (numeric)	Hand-Wing Index (numeric)
Predicts_sc1_2010_marsh_2	PREDICTS	terrestrial	bird	vertebrate	185.762	0.112715	-12.2182	28	2008	2008		presence_absence	forest	I checked the google earth images and the sites fall all in forested areas. But there is a clear gradient of dense forest to non-dense forest. The authors describe the area as On Grande Comore, habitat was classified into seven categories: (i) Mature forest; (ii) Underplanted forest, where banana trees have been planted beneath a primary canopy; (iii) Regenerating forest Type A, which is dominate…	Google earth images	This is not a study, but I found this report: https://www.africanbirdclub.org/sites/default/files/Comores_Conservation_2005_0.pdf	Body Mass (g) (numeric)	Trophic Level (Carnivore, Herbivore, Omnivore)	Habitat Breadth IUCN (numeric)	Hand-Wing Index (numeric)
Predicts_sc1_2010_rey_benayas_1	PREDICTS	terrestrial	bird	vertebrate	6869.24	0.257295	40.3693	63	2008	2009		abundance	multiple	We surveyed bird communities in a ca. 6000 km2 area in central Spain, with extreme coordinates of 41◦00'N (North), 39◦54'N (South), 3◦46'W (West), and 2◦51'W (East). The altitude ranges from 631 to 1008 m a.s.l. The climate in this region is continental Mediterranean, with cold winters and warm dry summers. The annual precipitation ranges from 436 mm in the lowest southern part to 598 mm in the h…	Google earth images and ref.	Rey-Benayas, J. M., Galván, I., & Carrascal, L. M. (2010). Differential effects of vegetation restoration in Mediterranean abandoned cropland by secondary succession and pine plantations on bird assemblages. Forest Ecology and Management, 260(1), 87–95. doi:10.1016/j.foreco.2010.04.0	Body Mass (g) (numeric)	Trophic Level (Carnivore, Herbivore, Omnivore)	Habitat Breadth IUCN (numeric)	Hand-Wing Index (numeric)
Predicts_sc1_2011_stouffer_1	PREDICTS	terrestrial	bird	vertebrate	55.1059	0.544024	-2.36541	117	2007	2007		abundance	forest	The Biological Dynamics of Forest Fragments Project (BDFFP) conducted a long-term study on the species present in forest fragments near Manaus, Brazil (2u 309S, 60uW). The project sampled eleven continuous forest plots starting in 1979, which were later isolated as 1-ha (n=5), 10-ha (n=4), and 100-ha (n=2) fragments in 1980. The site selection and isolation processes are detailed in [29,30]. The …	Google earth images and ref.	Stouffer, P. C., Johnson, E. I., Bierregaard, R. O., & Lovejoy, T. E. (2011). Understory Bird Communities in Amazonian Rainforest Fragments: Species Turnover through 25 Years Post-Isolation in Recovering Landscapes. PLoS ONE, 6(6), e20543. doi:10.1371/journal.pone.00205	Body Mass (g) (numeric)	Trophic Level (Carnivore, Herbivore, Omnivore)	Habitat Breadth IUCN (numeric)	Hand-Wing Index (numeric)
Predicts_sc2_2012_santana_1	PREDICTS	terrestrial	bird	vertebrate	197.794	0.514112	37.2338	54	2005	2006		abundance	forest	Forest stands were selected according to a stratified random procedure (details in Santana et al. 2011). Briefly, random locations were distributed across the study area at >800 m from each other, within forest stands with >30% canopy cover by cork oaks. Stands affected by fire were excluded to avoid confounding the effects of mechanical fuel management and burning. Each random location was class…	Google earth images and ref.	Santana, J., Porto, M., Gordinho, L., Reino, L., & Beja, P. (2012). Long‐term responses of Mediterranean birds to forest fuel management. Journal of Applied Ecology, 49(3), 632-643.	Body Mass (g) (numeric)	Trophic Level (Carnivore, Herbivore, Omnivore)	Habitat Breadth IUCN (numeric)	Hand-Wing Index (numeric)
Predicts_se2_2013_brandt_1	PREDICTS	terrestrial	bird	vertebrate	91.9859	0	27.7729	82	2010	2011		abundance	forest	We conducted bird point count surveys at six sacred forest sites that ranged in size from 13 to 75 ha (Fig. 1b). We surveyed a total of 62 plots, including 35 within the sacred forests, 9 edge plots (60 m away from the sacred forest boundary), and 18 matrix plots (260 and 520 m from the boundary) (Fig. 1c).	Google earth images and ref.	Brandt, J. S., Wood, E. M., Pidgeon, A. M., Han, L. X., Fang, Z., & Radeloff, V. C. (2013). Sacred forests are keystone structures for forest bird conservation in southwest China’s Himalayan Mountains. Biological Conservation, 166, 34-42.	Body Mass (g) (numeric)	Trophic Level (Carnivore, Herbivore, Omnivore)	Habitat Breadth IUCN (numeric)	Hand-Wing Index (numeric)
Predicts_se2_2013_hassan_1	PREDICTS	terrestrial	bird	vertebrate	478.55	0.084109	-5.78081	89	2010	2011		presence_absence	forest	Data were collected from October 2010 to January 2011, and each forest was visited for 5 consecutive days a month (n = 20 days a month for all 4 forests). Each forest was stratified into forest core (300 m from the edge) and forest edge. Then, permanent transects (n = 8) each 500 m long were randomly established in the core and the edge of each forest (Table 1). Selection of sites for placement o…	Google earth images and ref.	Hassan, S. N., Salum, A. R., Rija, A. A., Modest, R., Kideghesho, J. R., & Malata, P. F. (2013). Human-induced disturbances influence on bird communities of coastal forests in eastern Tanzania.	Body Mass (g) (numeric)	Trophic Level (Carnivore, Herbivore, Omnivore)	Habitat Breadth IUCN (numeric)	Hand-Wing Index (numeric)
Predicts_sh1_2012_ims_1	PREDICTS	terrestrial	bird	vertebrate	565.186	0.166754	70.3936	16	2010	2011		abundance	multiple	The study was carried out in the regions of Varanger peninsula and Laksefjord tundra (70–71°N) in northern Norway. In each region we located 10–11 bird census plots in riparian sediment plains in a matched design with 5–6 plots with and without willow thickets, respectively. Habitats with willow thickets (Fig. 1A) had patches of approximately 80–240 cm tall shrubs that formed closed canopies surr…	Google earth images and ref.	Ims, R. A., & Henden, J. (2012). Collapse of an arctic bird community resulting from ungulate-induced loss of erect shrubs. Biological Conservation, 149(1), 2-5. https://doi.org/10.1016/j.biocon.2012.02.008	Body Mass (g) (numeric)	Trophic Level (Carnivore, Herbivore, Omnivore)	Habitat Breadth IUCN (numeric)	Hand-Wing Index (numeric)
Predicts_tn1_2007_o_dea_1	PREDICTS	terrestrial	bird	vertebrate	183.581	0.0219564	0.0230264	211	2003	2003		abundance	multiple	Three hundred point counts were performed at 150 sites, 75 sites in each of the two study areas, in May and June 2003, the beginning of the dry season. Point count survey sites ranged from 1,100 m to 2,000 m in altitude and were selected without prior knowledge of bird distributions. Due to the extremely rugged terrain and access limitations, sites were located on existing trails (van Rensburg et…	Google earth images and ref.	O’Dea, N., & Whittaker, R. J. (2007). How resilient are Andean montane forest bird communities to habitat degradation? Biodivers Conserv16: 1131–1159.	Body Mass (g) (numeric)	Trophic Level (Carnivore, Herbivore, Omnivore)	Habitat Breadth IUCN (numeric)	Hand-Wing Index (numeric)
Predicts_vk1_2007_st_laurent_3	PREDICTS	terrestrial	bird	vertebrate	3692.02	0.150851	50.2057	25	2004	2004		abundance	forest	This study was conducted in the black spruce (Picea mariana (Mill.) BSP) boreal forest, located north of Lac-Saint-Jean, Quebec (50°09'N, 72°20'W). The mean elevation of the study area is 505 m. The study area has undergone logging, with approximately 30% of the area logged using the cutting with regeneration and soil protection technique. This modified clear-cutting technique requires that harve…	Google earth images and ref.	St-Laurent, M. H., Ferron, J., Hins, C., & Gagnon, R. (2007). Effects of stand structure and landscape characteristics on habitat use by birds and small mammals in managed boreal forest of eastern Canada. Canadian Journal of Forest Research, 37(8), 1298-1309.	Body Mass (g) (numeric)	Trophic Level (Carnivore, Herbivore, Omnivore)	Habitat Breadth IUCN (numeric)	Hand-Wing Index (numeric)
Predicts_vk1_2011_edenius_1	PREDICTS	terrestrial	bird	vertebrate	17.2643	0.0953061	57.0083	28	2010	2010		abundance	forest	The study was conducted in Toftaholm, located in the hemi-boreal zone in southern Sweden. The area is dominated by Norway spruce forest intermixed with patches of deciduous forest and lakes. The study compared fertilized and unfertilized spruce stands in the same developmental stage distributed over a c. 15 km2 large area at Toftaholm. Four fertilized stands and 12 unfertilized stands were select…	Google earth images and ref.	Edenius, L., Mikusiński, G., & Bergh, J. (2011). Can repeated fertilizer applications to young Norway spruce enhance avian diversity in intensively managed forests?. Ambio, 40, 521-527.	Body Mass (g) (numeric)	Trophic Level (Carnivore, Herbivore, Omnivore)	Habitat Breadth IUCN (numeric)	Hand-Wing Index (numeric)
Predicts_vk1_2011_zimmerman_1	PREDICTS	terrestrial	bird	vertebrate	2.48021	0.152565	48.1683	27	2004	2004		abundance	forest	The study site is located approximately 60 km southwest of Thunder Bay, Ontario and consists of white spruce/black spruce plantations along with remnant stands of mature trembling aspen/spruce. The plantations were established on clearcut sites that previously supported trembling aspen-white spruce forests. Four vegetation management treatments were applied in each block, including two separate h…	Google earth images and ref.	Zimmerman, G., Bell, F. W., Woodcock, J., Palmer, A., & Paloniemi, J. (2011). Response of breeding songbirds to vegetation management in conifer plantations established in boreal mixedwoods. The Forestry Chronicle, 87(2), 217-224.	Body Mass (g) (numeric)	Trophic Level (Carnivore, Herbivore, Omnivore)	Habitat Breadth IUCN (numeric)	Hand-Wing Index (numeric)
Predicts_vk1_2012_otto_1	PREDICTS	terrestrial	bird	vertebrate	836.987	0.227746	44.3898	20	2010	2010		presence_absence	forest	The study was conducted in the Cadillac-Traverse City area in the northwestern Lower Peninsula of Michigan, USA in 2010-2011 on state-owned forest lands that were managed for aspen production. The study area had porous sandy soils and was characterized as a glacial outwash-plain. The forest management practices included green-tree retention prescriptions that called for the retention of 3-10% of …	Google earth images and ref.	Otto, C. R., & Roloff, G. J. (2012). Songbird response to green-tree retention prescriptions in clearcut forests. Forest Ecology and Management, 284, 241-250.	Body Mass (g) (numeric)	Trophic Level (Carnivore, Herbivore, Omnivore)	Habitat Breadth IUCN (numeric)	Hand-Wing Index (numeric)
Predicts_vk1_2012_otto_2	PREDICTS	terrestrial	bird	vertebrate	1221.02	0.250312	44.4843	20	2011	2011		presence_absence	forest	The study was conducted in the Cadillac-Traverse City area in the northwestern Lower Peninsula of Michigan, USA in 2010-2011 on state-owned forest lands that were managed for aspen production. The study area had porous sandy soils and was characterized as a glacial outwash-plain. The forest management practices included green-tree retention prescriptions that called for the retention of 3-10% of …	Google earth images and ref.	Otto, C. R., & Roloff, G. J. (2012). Songbird response to green-tree retention prescriptions in clearcut forests. Forest Ecology and Management, 284, 241-250.	Body Mass (g) (numeric)	Trophic Level (Carnivore, Herbivore, Omnivore)	Habitat Breadth IUCN (numeric)	Hand-Wing Index (numeric)
ribera_beetles	Google Scholar search	terrestrial	insect	invertebrate	31734.8	0	56.6357	68	2002	2002		abundance	agriculture	Sites were chosen to best represent the diversity of the Scottish landscape, following a general gradient from intensive cereal fields to extensive upland grasslands or moorland dominated by heather (Calluna vulgaris), often managed by periodic burning. Land use is strongly associated with several disturbance factors (e.g., removal of biomass by cropping or grazing, and soil disturbance by tillag…	Google earth images and ref.	Ribera, I., Dolédec, S., Downie, I. S., & Foster, G. N. (2001). Effect of land disturbance and stress on species traits of ground beetle assemblages. Ecology, 82(4), 1112-1129.	LTL (numeric)	FOA (coll, general, plant)	LAL (Antennal Length Component) (numeric)	WIN (Apter, Dimorph, Macro)
romero_waterinsects	Co-authors	aquatic	waterinsect	e	441313	14.8812	-20.8967	158	2000	2019		abundance	forest	This study was carried out in 12 Brazilian coastal sites along a latitudinal gradient ranging from 12°34′ to 27°37′ S (ca. 2,040 km), with altitudes varying from 3 to 91 m asl. The average distance between neighboring sites was 199 km (max 566.3 km, min 14.7 km; Gonçalves-Souza et al. 2014, 2015). To minimize the influence of environmental heterogeneity (e.g., light incidence, resource availabili…	Google earth images and ref.	Romero, G. Q., Piccoli, G. C., de Omena, P. M., & Gonçalves‐Souza, T. (2016). Food web structure shaped by habitat size and climate across a latitudinal gradient. Ecology, 97(10), 2705-2715.	Biomass (numeric)	Predator.Detritivorous (Detritivorous, Predator)	Functional Group (Collector-gatherer, Collector-grazer, Conveyor-belt deposit fee, Filter feeder, Liquid feeder, Predator-engulfer, Predator-piercer, Scraper, Shredder)	LO1, LO2, LO3, LO4, LO5, LO6, LO7 (numeric)
S29TTP	Distance Decay 2.0	terrestrial	plant	plant	319.538	0.961361	-29.2621	164	2015	2018		abundance	forest	A total of 208 full floristic 20 x 20 m plots were surveyed for vascular plants scored using the Braun-Blanquet six point cover abundance scale (Westhoff & Maarel 1978). In addition, 233 rapid survey plots (RPD) recording only dominant species of each stratum were also placed. Thirty-four of the full floristic plots were originally permanently marked during initial post purchase surveys conducted…	Google earth images and ref.	Hunter, J.T. (2016). Vegetation of Naree and Yantabulla stations on the Cuttaburra Creek, Far North Western Plains, New South Wales. Cunninghamia.	Plant Height (mean) (numeric)	SLA (mean) (numeric)	Stem Density (mean)	Seed Mass (mean) (numeric)
shieh_waterinsects	CESTES	aquatic	waterinsect	invertebrate	201.362	0	24.0471	30	2006	2006		abundance	multiple	The study was conducted at seven sites along the Wu Stream. Site 1 is on a tributary stream and has natural broadleaf and planted coniferous forests. Site 2 is in a recreation area with a few agricultural activities. Site 3 is located in an agricultural area with orchards and rice paddies. Site 4 is in an area with both municipal and agricultural impacts. Sites 5-7 are in the Taichung metropolita…	Google earth images and ref.	Shieh, S. H., Wang, L. K., & Hsiao, W. F. (2012). Shifts in functional traits of aquatic insects along a subtropical stream in Taiwan. Zoological Studies, 51(7), 1051-1065.	Size5, Size10, Size20, Size40, Size50	FP, CP, Mip, Map, Mii, Mai	SW, CR, BU, TA, PA	SL, FL, CY, SP
stavert_bees	Google Scholar search	terrestrial	insect	invertebrate	3071.6	2.80373	-37.948	22	2014	2014		abundance	agriculture	We selected 12 study sites that represented a gradient of land-use intensification in an 80 × 60 km area within the Waikato Region, New Zealand. Sites were separated by at least 3 km (range 3–20 km) to ensure that we sampled separate pollinator communities. All sites were contained within conventional farms to minimize inter-site variation in insecticide use, which can affect insect pollinator co…	Google earth images and ref.	Stavert, J. R., Pattemore, D. E., Gaskett, A. C., Beggs, J. R., & Bartomeus, I. (2017). Exotic species enhance response diversity to land-use change but modify functional composition. Proceedings of the Royal Society B: Biological Sciences, 284(1860), 20170788.	Body Length (mean)	Tongue Length (mean)	Habitat Type (belowground, carcass, cavity, dung, parasitic, plant surface, soil surface, water)	Mobility Class (ordered: 1-5)
toxywa_beetles_nonsaproxylic	Co-authors	terrestrial	insect	invertebrate	5401.7	0.0313333	47.3442	124	2010	2011		abundance	forest	In order to investigate the influence of management intensity on saproxylic beetles, the study sites were distributed along a management gradient: from production forests, which are regularly managed, to old natural forest reserves (without management for at least the last 50 years). For this purpose, 15 beech forest stands were selected, distributed from the Jura to the Prättigau. On each beech …	Google earth images	Unpublished	Mean Body Size (cm)	Feeding Type (carnivore, detritivore, herbivore, mixed, omnivore)	Habitat Stratum (ground, herbaceous, intermediate, shrub, tree)	Wing Type (dimorphic, shortwinged, winged)
toxywa_beetles_saproxylic	Co-authors	terrestrial	insect	invertebrate	5399.6	0.0313333	47.3442	372	2010	2011		abundance	forest	In order to investigate the influence of management intensity on saproxylic beetles, the study sites were distributed along a management gradient: from production forests, which are regularly managed, to old natural forest reserves (without management for at least the last 50 years). For this purpose, 15 beech forest stands were selected, distributed from the Jura to the Prättigau. On each beech …	Google earth images	Unpublished	Mean Body Length (from literature) (cm)	Mandible Aspect Ratio	Body Roundness	Wing Load
vanklink_bees	Distance Decay 2.0	terrestrial	insect	invertebrate	4973.25	0.541281	46.9664	46	2015	2015		abundance	agriculture	Twelve study areas, spaced between 5 and 195 km apart, were selected on the Swiss Plateau, the lowland region situated between the Jura Mountains and the Alps. These sites represent a typical example of the Western-/Central-European agricultural landscape, where high-intensity agriculture (about 70% of the matrix) is interspersed with human settlements, industry, infrastructure, and forest stands…	Google earth images and ref.	Van Klink, R., Menz, M. H., Baur, H., Dosch, O., Kühne, I., Lischer, L., ... & Humbert, J. Y. (2019). Larval and phenological traits predict insect community response to mowing regime manipulations. Ecological Applications, 29(4), e01900.	Minimum Body Size (Female), Maximum Body Size (Female), Minimum Body Size (Male), Maximum Body Size (Male)	Feeding Specialization	Nesting Guild	Minimum Flight Speed
vanklink_carabids	Distance Decay 2.0	terrestrial	insect	invertebrate	4980.48	0.541281	46.978	60	2015	2015		abundance	agriculture	Twelve study areas, spaced between 5 and 195 km apart, were selected on the Swiss Plateau, the lowland region situated between the Jura Mountains and the Alps. These sites represent a typical example of the Western-/Central-European agricultural landscape, where high-intensity agriculture (about 70% of the matrix) is interspersed with human settlements, industry, infrastructure, and forest stands…	Google earth images and ref.	Van Klink, R., Menz, M. H., Baur, H., Dosch, O., Kühne, I., Lischer, L., ... & Humbert, J. Y. (2019). Larval and phenological traits predict insect community response to mowing regime manipulations. Ecological Applications, 29(4), e01900.	Minimum Body Size, Maximum Body Size	Trophic Level	Habitat Generalism	Hind Wing Development
vanklink_hoverflies	Distance Decay 2.0	terrestrial	insect	invertebrate	4200.93	1.91736	46.976	24	2015	2015		abundance	agriculture	Twelve study areas, spaced between 5 and 195 km apart, were selected on the Swiss Plateau, the lowland region situated between the Jura Mountains and the Alps. These sites represent a typical example of the Western-/Central-European agricultural landscape, where high-intensity agriculture (about 70% of the matrix) is interspersed with human settlements, industry, infrastructure, and forest stands…	Google earth images and ref.	Van Klink, R., Menz, M. H., Baur, H., Dosch, O., Kühne, I., Lischer, L., ... & Humbert, J. Y. (2019). Larval and phenological traits predict insect community response to mowing regime manipulations. Ecological Applications, 29(4), e01900.	Size Minimum, Size Maximum	Larval Feeding Guild	Larval Substrate	Wing Loading
vanklink_staphylinids	Distance Decay 2.0	terrestrial	insect	invertebrate	4980.47	0.541281	46.9643	82	2015	2015		abundance	agriculture	Twelve study areas, spaced between 5 and 195 km apart, were selected on the Swiss Plateau, the lowland region situated between the Jura Mountains and the Alps. These sites represent a typical example of the Western-/Central-European agricultural landscape, where high-intensity agriculture (about 70% of the matrix) is interspersed with human settlements, industry, infrastructure, and forest stands…	Google earth images and ref.	Van Klink, R., Menz, M. H., Baur, H., Dosch, O., Kühne, I., Lischer, L., ... & Humbert, J. Y. (2019). Larval and phenological traits predict insect community response to mowing regime manipulations. Ecological Applications, 29(4), e01900.	Body Length Min, Body Length Max	Feeding Guild Short	Humidity Preference	Dispersal Ability
yates_ants	Distance Decay 2.0	terrestrial	insect	invertebrate	15192.3	0	-28.3833	123	2007	2007		abundance	agriculture	To test the relationship between macrohabitat, microhabitat and morphology, we selected three replicate paired sites (pasture vs remnant vegetation) in three areas (3∗2∗3 = 18 sites). The areas were Boomi (mean maximum temperature = 27.6°C; mean rainfall = 505.9 mm year; elevation = 160 m a.s.l.), Inverell (mean maximum temperature = 23.9°C; mean rainfall = 805.3 mm year; elevation = 582 m a.s.l.…	Google earth images and ref.	Yates, M. L., Andrew, N. R., Binns, M., & Gibb, H. (2014). Morphological traits: predictable responses to macrohabitats across a 300 km scale. PeerJ, 2, e271.	Thorax length	ML (Mandible Length)	SL (Scape Length)	Femur length
