# Supplementary material for: Human pressure homogenises species and traits globally
Source: Research Square preprint supplement (doi:10.21203/rs.3.rs-5395446/v1), 2024-11-27
Supplement: Supplementary file 2 [file 628e0b73050f594b6b3bb2da.docx]

**Human pressure homogenises species and traits globally**

Caio Graco-Roza¹,²,³*, Mark K. L. Wong⁴,³*, Nicholas A. Barber⁵, Jakob Brodersen⁶,⁷, Marcos Callisto⁸, Diego M. P. Castro⁹, William Dröse¹⁰, Adrienne Etard¹¹,¹², Thiago Gonçalves-Souza¹³, Catherine Graham³, Vera L. M. Huszar¹⁴, Marco Isaia¹⁵,¹⁶, Thibault Lachat¹⁷,³, Marcelo M. Marinho¹⁸, Marco Moretti³, Alessandro Ossola¹⁹,²⁰, Elena Piano¹⁵, Gustavo Q. Romero²¹, Tobias Roth²², Ole Seehausen⁶,⁷, Jamie R. Stavert²³, Janne Soininen¹, Nicolas Strebel²⁴, Thomas Wohlgemuth³, Florian Altermatt²⁵,²⁶§, Martin M. Gossner³,²⁷§

# Supplementary Material 2 - Model selection summary

## Model Selection Process

To ensure the robustness of our results, we conducted a series of model selection tests to evaluate the impact of model complexity on predictive performance. Our base models included varying intercepts for the broader biotic groups: vertebrates, invertebrates, plants, and microorganisms (taxon coarse).

To explore whether a finer resolution using major taxonomic groups—such as amphibians, bats, birds, fish, fungi, gastropods, insects, and water insects (taxon fine)—would improve model performance, we developed a nested model allowing intercepts for the major taxonomic groups to vary within the broader biotic groups.

## Interactions Considered

We also considered potential interactions between categorical predictors, including:

1. Ecosystem Type × Main Land Use,
2. Relationship of Direction × Main Land Use,
3. Relationship of Direction × Ecosystem Type,
4. Ecosystem Type × Main Land Use,
5. Relationship of Direction × Main Land Use × Ecosystem Type

## Model Performance Assessment

## Model performance was assessed using leave-one-out cross-validation (LOO), which estimates out-of-sample predictive accuracy. The expected log predictive density (ELPD) was calculated from the log-likelihood evaluated at the posterior simulations of parameter values. In most cases, base models with varying intercepts for biotic groups outperformed more complex models, showing no significant improvement from incorporating finer taxonomic group resolution or interaction terms (Supplementary Tables 12, and 4). When models with interactions were tested, they were generally either outperformed by the base model or did not differ significantly from it, leading us to prefer the simpler, base models for interpretation. An exception was observed for trait replacement in the shape of the relationship, where models that included an interaction between Relationship of Direction and Main Land Use provided significantly better predictive performance (Supplementary Table 3).

## Supplementary Table 1 | Model Selection for Relationship Direction. Summary of model performance metrics for various models predicting the direction of relationships. Metrics include Leave-One-Out Information Criterion (LOOIC), Expected Log Predictive Density (ELPD), standard errors (SE) for LOOIC and ELPD, and other performance indicators. The models vary in terms of random effects (RE) structure and interaction terms. Lower LOOIC values indicate better model fit, while ΔELPD and its confidence interval provide a measure of improvement or decline in predictive accuracy relative to the best model. If models were not significantly different than each other (i.e., ΔELPD ± 1.96 × SE includes zero) we chose the simplest model for interpretation. The model chosen is highlighted in bold.

| Biodiversity Facet | Terms | RE | LOOIC | SE  LOOIC | ELPD | SE  ELPD | P  LOO | ΔELPD | ΔSE ELPD | ΔELPD ± 1.96 × SE |
| --- | --- | --- | --- | --- | --- | --- | --- | --- | --- | --- |
| Species replacement | **None** | **(1 | Taxon coarse)** | **710.8** | **29.3** | **-355.4** | **14.6** | **17.2** | **-0.1** | **0.6** | **(-1.28, 1.08)** |
| Ecosystem Type × Main Land Use | (1 | Taxon coarse) | 714.3 | 29.2 | -357.2 | 14.6 | 18.3 | -1.8 | 0.6 | (-2.98, -0.62) |
| None | (1 |Taxon coarse / Taxon fine) | 710.7 | 29.4 | -355.3 | 14.7 | 17.8 | 0 | 0 | (0, 0) |
| Ecosystem Type × Main Land Use | (1 |Taxon coarse / Taxon fine) | 714.8 | 29.1 | -357.4 | 14.5 | 19.2 | -2 | 0.5 | (-2.98, -1.02) |
| Trait replacement | **None** | **(1 | Taxon coarse)** | **693.2** | **31.9** | **-346.6** | **16** | **18.5** | **-1** | **1.9** | **(-4.72, 2.72)** |
| Ecosystem Type × Main Land Use | (1 | Taxon coarse) | 691.1 | 32 | -345.6 | 16 | 20.1 | 0 | 0 | (0, 0) |
| None | (1 |Taxon coarse / Taxon fine) | 693.5 | 31.9 | -346.8 | 16 | 19.1 | -1.2 | 1.9 | (-4.92, 2.52) |
| Ecosystem Type × Main Land Use | (1 |Taxon coarse / Taxon fine) | 692.5 | 32.1 | -346.2 | 16 | 21.1 | -0.7 | 0.4 | (-1.48, 0.08) |

**Supplementary** **Table 2 | Model Selection for Relationship Magnitude**. Summary of model performance metrics for various models predicting the magnitude of human pressure effects. Metrics include Leave-One-Out Information Criterion (LOOIC), Expected Log Predictive Density (ELPD), standard errors (SE) for LOOIC and ELPD, and other performance indicators. The models vary in terms of random effects (RE) structure and interaction terms. Lower LOOIC values indicate better model fit, while ΔELPD and its confidence interval provide a measure of improvement or decline in predictive accuracy relative to the best model. If models were not significantly different than each other (i.e., ΔELPD ± 1.96 × SE includes zero) we chose the simplest model for interpretation. The model chosen is highlighted in bold.

| Biodiversity Facet | Terms | RE | LOOIC | SE  LOOIC | ELPD | SE  ELPD | P  LOO | ΔELPD | ΔSE ELPD | ΔELPD ± 1.96 × SE |
| --- | --- | --- | --- | --- | --- | --- | --- | --- | --- | --- |
| Species replacement | **None** | **(1 | Taxon coarse)** | **-30** | **35.1** | **15** | **17.5** | **16.7** | **-1** | **1.2** | **(-3.35, 1.35)** |
|  | Relationship of Direction × Main Land Use | (1 | Taxon coarse) | -30 | 35.9 | 15 | 17.9 | 18.9 | -1 | 2.5 | (-5.9, 3.9) |
|  | Relationship of Direction × Ecosystem Type | (1 | Taxon coarse) | -30.7 | 35 | 15.4 | 17.5 | 16.8 | -0.7 | 1.2 | (-3.05, 1.65) |
|  | Ecosystem Type × Main Land Use | (1 | Taxon coarse) | -32.1 | 35 | 16 | 17.5 | 16.7 | 0 | 0 | (0, 0) |
|  | Relationship of Direction × Main Land Use × Ecosystem Type | (1 | Taxon coarse) | -29.1 | 35.3 | 14.6 | 17.6 | 20.5 | -1.5 | 1.9 | (-5.22, 2.22) |
|  | None | (1 |Taxon coarse / Taxon fine) | -31 | 35.4 | 15.5 | 17.7 | 16.5 | -0.5 | 1.3 | (-3.05, 2.05) |
|  | Relationship of Direction × Main Land Use | (1 |Taxon coarse / Taxon fine) | -29.6 | 35.9 | 14.8 | 17.9 | 19.3 | -1.2 | 2.5 | (-6.1, 3.7) |
|  | Relationship of Direction × Ecosystem Type | (1 |Taxon coarse / Taxon fine) | -29.9 | 35.1 | 14.9 | 17.6 | 17.5 | -1.1 | 1.4 | (-3.84, 1.64) |
|  | Ecosystem Type × Main Land Use | (1 |Taxon coarse / Taxon fine) | -31.6 | 35.1 | 15.8 | 17.5 | 17.2 | -0.2 | 0.3 | (-0.79, 0.39) |
|  | Relationship of Direction × Main Land Use × Ecosystem Type | (1 |Taxon coarse / Taxon fine) | -28.3 | 35.4 | 14.2 | 17.7 | 21.2 | -1.9 | 2.1 | (-6.02, 2.22) |
| Trait replacement | **None** | **(1 | Taxon coarse)** | **-101.4** | **31.4** | **50.7** | **15.7** | **16.3** | **-0.2** | **2** | **(-4.12, 3.72)** |
|  | Relationship of Direction × Main Land Use | (1 | Taxon coarse) | -101.6 | 31.6 | 50.8 | 15.8 | 18.8 | -0.1 | 0.3 | (-0.69, 0.49) |
|  | Relationship of Direction × Ecosystem Type | (1 | Taxon coarse) | -100.7 | 31.3 | 50.3 | 15.6 | 16.6 | -0.6 | 1.9 | (-4.32, 3.12) |
|  | Ecosystem Type × Main Land Use | (1 | Taxon coarse) | -100.5 | 31.3 | 50.2 | 15.7 | 17 | -0.7 | 2.1 | (-4.82, 3.42) |
|  | Relationship of Direction × Main Land Use × Ecosystem Type | (1 | Taxon coarse) | -96.4 | 31.5 | 48.2 | 15.8 | 21.2 | -2.7 | 1 | (-4.66, -0.74) |
|  | None | (1 |Taxon coarse / Taxon fine) | -101.6 | 31.3 | 50.8 | 15.6 | 16.8 | -0.1 | 1.9 | (-3.82, 3.62) |
|  | Relationship of Direction × Main Land Use | (1 |Taxon coarse / Taxon fine) | -101.8 | 31.6 | 50.9 | 15.8 | 19.3 | 0 | 0 | (0, 0) |
|  | Relationship of Direction × Ecosystem Type | (1 |Taxon coarse / Taxon fine) | -100.6 | 31.2 | 50.3 | 15.6 | 17.3 | -0.6 | 1.9 | (-4.32, 3.12) |
|  | Ecosystem Type × Main Land Use | (1 |Taxon coarse / Taxon fine) | -99.8 | 31.3 | 49.9 | 15.6 | 17.8 | -1 | 2 | (-4.92, 2.92) |
|  | Relationship of Direction × Main Land Use × Ecosystem Type | (1 |Taxon coarse / Taxon fine) | -96.2 | 31.6 | 48.1 | 15.8 | 21.9 | -2.8 | 1 | (-4.76, -0.84) |

## Supplementary Table 3 | Model Selection for Relationship Shape. Summary of model performance metrics for various models assessing the shape of the human pressure effect. The table includes Leave-One-Out Information Criterion (LOOIC), Expected Log Predictive Density (ELPD), and their standard errors (SE), along with comparisons of models based on interaction terms and random effects structures. Lower LOOIC values indicate better model fit, while ΔELPD and its confidence interval provide a measure of improvement or decline in predictive accuracy relative to the best model. If models were not significantly different than each other (i.e., ΔELPD ± 1.96 × SE includes zero) we chose the simplest model for interpretation. The model chosen is highlighted in bold.

| Biodiversity facet | Term | Random effect | KFOLDIC | SE  KFOLDIC | ELPD | SE  ELPD | P  KFOLD | ΔELPD | ΔSE  ELPD | ΔLOOIC ± 1.96 × SE |
| --- | --- | --- | --- | --- | --- | --- | --- | --- | --- | --- |
| Species replacement | **None** | **(1 | Taxon coarse)** | **139812,3** | **10250,4** | **-69906,1** | **5125,2** | **17388,8** | **0** | **0** | **(0, 0)** |
| Relationship of Direction × Main Land Use | (1 | Taxon coarse) | 152104,6 | 11714,6 | -76052,3 | 5857,3 | 24955,2 | -6146,1 | 2791,9 | (-11618,22, -673,98) |
| Relationship of Direction × Ecosystem Type | (1 | Taxon coarse) | 142376,7 | 9138,6 | -71188,3 | 4569,3 | 18977,9 | -1282,2 | 3047,5 | (-7255,3, 4690,9) |
| Ecosystem Type × Main Land Use | (1 | Taxon coarse) | 158718,6 | 11646,6 | -79359,3 | 5823,3 | 27617,2 | -9453,2 | 3168,3 | (-15789,8, -3116,6) |
| Relationship of Direction × Main Land Use × Ecosystem Type | (1 | Taxon coarse) | 167873,4 | 12733,1 | -83936,7 | 6366,5 | 34976,5 | -14030,5 | 4814,5 | (-23466,92, -4594,08) |
| None | (1 |Taxon coarse / Taxon fine) | 153722,9 | 11490,4 | -76861,4 | 5745,2 | 25681,3 | -6955,3 | 3122,1 | (-13074,62, -835,98) |
| Relationship of Direction × Main Land Use | (1 |Taxon coarse / Taxon fine) | 160314,9 | 12626,4 | -80157,5 | 6313,2 | 30513,3 | -10251,3 | 3667 | (-17438,62, -3063,98) |
| Relationship of Direction × Ecosystem Type | (1 |Taxon coarse / Taxon fine) | 147582,1 | 10673,8 | -73791,1 | 5336,9 | 22945,6 | -3884,9 | 2686,8 | (-9151,03, 1381,23) |
| Ecosystem Type × Main Land Use | (1 |Taxon coarse / Taxon fine) | 147375,3 | 12311 | -73687,6 | 6155,5 | 23392,9 | -3781,5 | 3662,1 | (-10959,22, 3396,22) |
| Relationship of Direction × Main Land Use × Ecosystem Type | (1 |Taxon coarse / Taxon fine) | 151183,4 | 11746,9 | -75591,7 | 5873,4 | 28309,1 | -5685,6 | 4103,7 | (-13728,85, 2357,65) |
| Trait replacement | None | **(1 | Taxon coarse)** | 144615,3 | 8283,3 | -72307,7 | 4141,7 | 21055,8 | -8096,6 | 3160,8 | (-14291,77, -1901,43) |
| **Relationship of Direction × Main Land Use** | **(1 | Taxon coarse)** | **138295,8** | **8596,6** | **-69147,9** | **4298,3** | **21514,6** | **-4936,9** | **3181,3** | **(-11172,25, 1298,45)** |
| Relationship of Direction × Ecosystem Type | (1 | Taxon coarse) | 146993,1 | 8402,4 | -73496,6 | 4201,2 | 22836,7 | -9285,5 | 2752,6 | (-14680,6, -3890,4) |
| Ecosystem Type × Main Land Use | (1 | Taxon coarse) | 129236 | 6989,8 | -64618 | 3494,9 | 13845,8 | -407 | 2282,6 | (-4880,9, 4066,9) |
| Relationship of Direction × Main Land Use × Ecosystem Type | (1 | Taxon coarse) | 133741,6 | 9068,3 | -66870,8 | 4534,1 | 21093,1 | -2659,8 | 3681 | (-9874,56, 4554,96) |
| None | (1 |Taxon coarse / Taxon fine) | 139556,4 | 8399,1 | -69778,2 | 4199,6 | 20190,3 | -5567,1 | 2523,2 | (-10512,57, -621,63) |
| Relationship of Direction × Main Land Use | (1 |Taxon coarse / Taxon fine) | 138476 | 8680,5 | -69238 | 4340,3 | 23131,2 | -5026,9 | 3564,8 | (-12013,91, 1960,11) |
| Relationship of Direction × Ecosystem Type | (1 |Taxon coarse / Taxon fine) | 128422,1 | 7743,8 | -64211 | 3871,9 | 15090 | 0 | 0 | (0, 0) |
| Ecosystem Type × Main Land Use | (1 |Taxon coarse / Taxon fine) | 147038,3 | 8934,4 | -73519,2 | 4467,2 | 24483,6 | -9308,1 | 3451 | (-16072,06, -2544,14) |
| Relationship of Direction × Main Land Use × Ecosystem Type | (1 |Taxon coarse / Taxon fine) | 138774,2 | 9212 | -69387,1 | 4606 | 25295,8 | -5176,1 | 3659,1 | (-12347,94, 1995,74) |

**Supplementary** **Table 4 | Model Selection for Disproportionate Effects on Trait and Species Replacement.** Summary of model performance metrics for various models assessing baseline and complex models with different random effects structures across three response categories (Direction, Magnitude, Shape). Metrics include Leave-One-Out Information Criterion (LOOIC), Expected Log Predictive Density (ELPD), standard errors (SE) for LOOIC and ELPD, and other performance indicators. Lower LOOIC values indicate better model fit, while ΔELPD and its confidence interval provide a measure of improvement or decline in predictive accuracy relative to the best model.If models were not significantly different than each other (i.e., ΔELPD ± 1.96 × SE includes zero) we chose the simplest model for interpretation. The model chosen is highlighted in bold. Models with empty rows indicate cases in which the model didn’t converge.

| Response | Terms | RE | LOOIC | SE  LOOIC | ELPD | SE  ELPD | P  LOO | ΔELPD | ΔSE ELPD | ΔELPD ± 1.96 × SE |
| --- | --- | --- | --- | --- | --- | --- | --- | --- | --- | --- |
| Direction | **None** | **(1 | Taxon coarse)** | **359,10** | **16,60** | **-179,60** | **8,30** | **34,20** | **-3,20** | **2,90** | **(-8,88, 2,48)** |
| Ecosystem Type × Main Land Use | (1 | Taxon coarse) | 359,00 | 16,50 | -179,50 | 8,30 | 36,30 | -3,10 | 3,20 | (-9,37, 3,17) |
| None | (1 |Taxon coarse / Taxon fine) | 352,70 | 16,20 | -176,40 | 8,10 | 35,30 | 0,00 | 0,00 | (0, 0) |
| Ecosystem Type × Main Land Use | (1 |Taxon coarse / Taxon fine) | 354,90 | 16,40 | -177,50 | 8,20 | 39,00 | -1,10 | 1,00 | (-3,06, 0,86) |
| Magnitude | **None** | **(1 | Taxon coarse)** | **354** | **17,4** | **-177** | **8,7** | **35,5** | **-0,4** | **2,3** | **(-5.0, 4.2)** |
| Ecosystem Type × Main Land Use | (1 | Taxon coarse) | 353,3 | 17,2 | -176,6 | 8,6 | 38,2 | 0 | 0 | reference model |
| Ecosystem Type × Direction | (1 | Taxon coarse) | 357,1 | 17,7 | -178,5 | 8,8 | 37,4 | -1,9 | 2,6 | (-6.9, 3.1) |
| Ecosystem Type × Main Land Use × Direction | (1 | Taxon coarse) | 362 | 19,7 | -181 | 9,8 | 48,3 | -4,4 | 3,5 | (-11.3, 2.5) |
| None | (1 |Taxon coarse / Taxon fine) | 355,2 | 17,5 | -177,6 | 8,8 | 36,9 | -1 | 2,4 | (-5.7, 3.7) |
| Ecosystem Type × Main Land Use | (1 |Taxon coarse / Taxon fine) | 354,7 | 17,2 | -177,4 | 8,6 | 39,9 | -0,7 | 0,5 | (-1.7, 0.3) |
| Main Land Use × Direction | (1 |Taxon coarse / Taxon fine) | 359 | 19,5 | -179,5 | 9,7 | 43 | -2,8 | 3,9 | (-10.5, 4.9) |
| Ecosystem Type × Direction | (1 |Taxon coarse / Taxon fine) | 359,2 | 17,8 | -179,6 | 8,9 | 39,2 | -3 | 2,7 | (-8.3, 2.3) |
| Shape | **None** | **(1 | Taxon coarse)** | **1195,5** | **62,3** | **-597,8** | **31,1** | **157,6** | **0** | **0** | **(0, 0)** |
| Ecosystem Type ×Main Land Use | (1 | Taxon coarse) | – | – | – | – | – | – | – | – |
| Land Use ×Direction | (1 | Taxon coarse) | 1217,7 | 66,1 | -608,8 | 33 | 190,8 | -11,1 | 9,6 | (-29,92, 7,72) |
| Ecosystem Type ×Land Use ×Direction | (1 | Taxon coarse) | – | – | – | – | – | – | – | – |
| None | (1 | Taxon coarse / Taxon fine) | 1202,7 | 62,2 | -601,3 | 31,1 | 169,1 | -3,6 | 3,1 | (-9,68, 2,48) |
| Ecosystem Type ×Main Land Use | (1 | Taxon coarse / Taxon fine) | – | – | – | – | – | – | – | – |
| Land Use ×Direction | (1 | Taxon coarse / Taxon fine) | 1228,3 | 67 | -614,2 | 33,5 | 204,7 | -16,4 | 10,4 | (-36,78, 3,98) |
| Ecosystem Type ×Land Use ×Direction | (1 | Taxon coarse / Taxon fine) | – | – | – | – | – | – | – | – |
